# Supplementary material for: Polypharmacy among patients with diabetes: a cross-sectional retrospective study in a tertiary hospital in Saudi Arabia
Source: PubMed Central journal article supplement — BMJ Open. 2018 May 24;8(5):e020852. doi: 10.1136/bmjopen-2017-020852 (PMC5988096; doi:10.1136/bmjopen-2017-020852), 2018-05-24
Supplement: bmjopen-2017-020852.draft_revisions.pdf [file bmjopen-2017-020852.draft_revisions.pdf]

# BMJ Open

BMJ Open is committed to open peer review. As part of this commitment we make the peer review history of every article we publish publicly available.

When an article is published we post the peer reviewers' comments and the authors' responses online. We also post the versions of the paper that were used during peer review. These are the versions that the peer review comments apply to.

The versions of the paper that follow are the versions that were submitted during the peer review process. They are not the versions of record or the final published versions. They should not be cited or distributed as the published version of this manuscript.

BMJ Open is an open access journal and the full, final, typeset and author-corrected version of record of the manuscript is available on our site with no access controls, subscription charges or pay-per-view fees (<http://bmjopen.bmj.com>).

If you have any questions on BMJ Open's open peer review process please email [info.bmjopen@bmj.com](mailto:info.bmjopen@bmj.com)

# BMJ Open

## Polypharmacy Use among Patients with Diabetes: A Cross-Sectional Retrospective Study

|                                 |                                                                                                                                                                                                                                                                                                                                                                                                                                                                                                                                                                                                                                                                                                                                                                                                                |
|---------------------------------|----------------------------------------------------------------------------------------------------------------------------------------------------------------------------------------------------------------------------------------------------------------------------------------------------------------------------------------------------------------------------------------------------------------------------------------------------------------------------------------------------------------------------------------------------------------------------------------------------------------------------------------------------------------------------------------------------------------------------------------------------------------------------------------------------------------|
| Journal:                        | <i>BMJ Open</i>                                                                                                                                                                                                                                                                                                                                                                                                                                                                                                                                                                                                                                                                                                                                                                                                |
| Manuscript ID                   | bmjopen-2017-020852                                                                                                                                                                                                                                                                                                                                                                                                                                                                                                                                                                                                                                                                                                                                                                                            |
| Article Type:                   | Research                                                                                                                                                                                                                                                                                                                                                                                                                                                                                                                                                                                                                                                                                                                                                                                                       |
| Date Submitted by the Author:   | 29-Nov-2017                                                                                                                                                                                                                                                                                                                                                                                                                                                                                                                                                                                                                                                                                                                                                                                                    |
| Complete List of Authors:       | Alwhaibi, Monira; King Saud University College of Pharmacy, Clinical Pharmacy; King Saud University College of Pharmacy, Medication Safety Research Chair<br>Balkhi, Bander; King Saud University College of Pharmacy, Clinical Pharmacy; King Saud University College of Pharmacy<br>Alhawassi, Tariq ; King Saud University College of Pharmacy, Clinical Pharmacy; King Saud University Medical City , Pharmacy Services<br>Alkofide, Hadeel; King Saud University College of Pharmacy, Clinical Pharmacy<br>Alduhaim, Nouf; King Saud University College of Pharmacy<br>Alabdulaali, Rawan; King Saud University College of Pharmacy<br>drweesh, hadeel ; King Saud University College of Pharmacy<br>Sambamoorthi, Usha; West Virginia University Health Sciences Center, Pharmaceutical Systems & Policy |
| <b>Primary Subject Heading</b>: | Pharmacology and therapeutics                                                                                                                                                                                                                                                                                                                                                                                                                                                                                                                                                                                                                                                                                                                                                                                  |
| Secondary Subject Heading:      | Diabetes and endocrinology, Epidemiology, Health services research, Pharmacology and therapeutics                                                                                                                                                                                                                                                                                                                                                                                                                                                                                                                                                                                                                                                                                                              |
| Keywords:                       | DIABETES & ENDOCRINOLOGY, Health & safety < HEALTH SERVICES ADMINISTRATION & MANAGEMENT, EPIDEMIOLOGY                                                                                                                                                                                                                                                                                                                                                                                                                                                                                                                                                                                                                                                                                                          |
|                                 |                                                                                                                                                                                                                                                                                                                                                                                                                                                                                                                                                                                                                                                                                                                                                                                                                |

SCHOLARONE™  
Manuscripts

## Polypharmacy Use among Patients with Diabetes: A Cross-Sectional Retrospective Study

Monira Alwhaibi, Ph.D<sup>1,2\*</sup>, Bander Balkhi, Pharm.D, Ph.D<sup>1,2</sup>, Tariq Alhawassi, Ph.D<sup>1,2,4</sup>,  
Hadeel Alkofide, PhD<sup>1</sup>, Nouf Alduhaim<sup>5</sup>, Rawan Alabdulali<sup>5</sup>, Hadeel Drweesh<sup>5</sup>, Usha  
Sambamoorthi, Ph.D<sup>3</sup>

<sup>1</sup> Department of Clinical Pharmacy, School of Pharmacy, King Saud University, Riyadh, Saudi Arabia

<sup>2</sup> Medication Safety Research Chair, School of Pharmacy, King Saud University, Riyadh, Saudi Arabia

<sup>3</sup> Department of Pharmaceutical Systems and Policy, School of Pharmacy, West Virginia University, Morgantown, West Virginia

<sup>4</sup> Pharmacy Services, King Saud University Medical City, Riyadh, Saudi Arabia

<sup>5</sup> School of Pharmacy, King Saud University, Riyadh, Saudi Arabia

\*Corresponding author: Monira Alwhaibi, MS, PhD, Assistant Professor, Department of Clinical Pharmacy, King Saud University, School of Pharmacy, Riyadh, 11149, Phone: +966535384152, E-mail: [malwhaibi@ksu.edu.sa](mailto:malwhaibi@ksu.edu.sa), [mmalwhaibi@mix.wvu.edu](mailto:mmalwhaibi@mix.wvu.edu)

## ABSTRACT

**Objectives.** Patients with diabetes are at high risk for polypharmacy (i.e. use of multiple classes of medications) for treatment of diabetes, associated comorbidities, and other co-existing conditions.

This study aims to estimate the prevalence of polypharmacy and factors associated with polypharmacy among adult patients with diabetes.

**Methods.** A cross-sectional retrospective observational study of adults with diabetes, who visited the outpatient clinic of a tertiary teaching hospital in Saudi Arabia, was conducted. Data were extracted from the Electronic Health Record (EHR) database for a period of twelve-month (January to December 2016). Polypharmacy was defined as the cumulative use of five or more medication classes. Polypharmacy among adults with diabetes was measured by calculating the average number of medication classes prescribed per patient. A multivariable logistic regression model was used to examine the factors associated with polypharmacy after adjusting for age, sex, marital status, nationality, and co-existing chronic conditions.

**Results.** A total of 8,932 adults with diabetes were included in this study. Of these, nearly 78 % had polypharmacy, which was more likely among women as compared to men and more likely among the elderly (age  $\geq 60$  years) as compared to the adults. Also, polypharmacy was two times as likely among patients with coexisting cardiovascular disease (AOR=2.89; 95% CI: 2.54-3.29), respiratory disease (AOR=2.42; 95% CI: 1.92-3.03), and mental health conditions (AOR=2.19; 95% CI: 1.74-2.76), and three times as likely among patients with co-existing musculoskeletal disease as compared to those without these co-existing chronic conditions categories.

**Conclusions.** Polypharmacy is common among patients with diabetes, with an even higher rate in the elderly patients. Health care providers can help in detecting polypharmacy and in providing recommendations for simplifying medication regimens and minimizing tablet-counts to enhance the outcome of diabetes care.

**Keywords.** Diabetes; Polypharmacy; Chronic conditions; Electronic health records.

### Strengths and limitations of this study

- Findings from this study have identified the individuals who have a high risk of polypharmacy and added to the existing literature on the prevalence of polypharmacy among all age groups.
- The study results highlighted the need to routinely monitor high-risk individuals for drug-related problems.
- This study has used a large sample size, which allowed us to do a subgroup analysis to examine the polypharmacy use among the elderly population.
- This study have not controlled for the severity of diabetes using the Diabetes Complications Severity Index (DCSI) which may affect the rate of polypharmacy.
- It has to be noticed that not all polypharmacy is harmful; however, we have not assessed if the polypharmacy was appropriate or not.

## INTRODUCTION

Diabetes is a highly prevalent chronic condition among adults in Saudi Arabia; between 21-24% of adults are estimated to have diabetes.<sup>1,2</sup> It is projected that 27% of adults in Saudi Arabia will have diabetes by 2035.<sup>3</sup> Diabetes is one of the top ten causes of morbidity and mortality worldwide.<sup>4</sup> Patients with diabetes often have co-existing chronic health conditions such as hypertension, dyslipidemia, coronary artery disease, depression and renal disease, which requires the use of multiple medications to treat those co-existing chronic conditions.<sup>5</sup> All of this put patients with diabetes at high risk of polypharmacy,<sup>6,7</sup> with an estimated prevalence of 57% to 84% of patients with diabetes using five or more medications.<sup>8</sup> In Saudi Arabia, a cross-sectional study among 766 adults who visited outpatient's clinic at a tertiary care center, reported that the prevalence of polypharmacy among patients with diabetes was 71%.<sup>9</sup>

An examination of polypharmacy among patients with diabetes is important because polypharmacy increases the probability of the adverse drug events, drug-drug interactions, duplication of therapy,<sup>10</sup> decrease compliance to antidiabetic medications,<sup>11</sup> and poor glycemic control.<sup>12</sup> The presence of polypharmacy is also associated with prescribing cascades, in which adverse drug events are misinterpreted as new medical conditions which can result in the prescription of new medications to treat those conditions.<sup>13</sup> Polypharmacy has other negative health consequences such as increased risk of hospitalization and medication error,<sup>14,15</sup> higher risk of fall,<sup>16</sup> poor functional status,<sup>17</sup> poor quality of life, and high healthcare cost.<sup>18,19</sup> Polypharmacy among diabetes patients is often associated with many factors. These include age,<sup>9</sup> sex,<sup>20</sup> co-existing conditions,<sup>20</sup> rurality,<sup>21,9</sup> diabetes complications, and aggressive diabetic treatment.<sup>22,23</sup>

To date, limited studies have examined the prevalence of polypharmacy among adults with diabetes living in Saudi Arabia on a large scale, and looking at specific factors that put patients at risk of polypharmacy. Identifying the prevalence and the subgroup of patients at high risk of polypharmacy will facilitate pharmacovigilance efforts in clinical practice settings. Therefore, the primary objective of this observational study is to examine the prevalence of polypharmacy among adults with diabetes in Saudi Arabia and to identify the factors that are associated with polypharmacy, specifically the association between co-existing chronic conditions and polypharmacy.

## **METHODS**

### **Study Design**

A cross-sectional retrospective observational study was conducted in a tertiary teaching hospital in Saudi Arabia.

### **Data Source and Data Extraction**

This study used data retrieved from the Electronic Health Record (EHR) database for the period from 1<sup>st</sup> January 2016, until 30<sup>th</sup> December 2016. Institutional review board (IRB) approval was obtained to conduct the study (IRB number: E-17-2601). Strict confidentiality of the data was maintained throughout the research process. The data from EHR were derived from demographics file, clinical diagnosis file, and prescription drug file. The demographics file contained information about the patients' date of birth, gender, marital status, nationality, and encounter type. The clinical diagnosis file provided information about the clinical diagnosis from inpatient and outpatient visits. Physicians reported clinical diagnosis using the *International Classifications of Diseases – 9<sup>th</sup> edition, Clinical Modification* (ICD-9-CM) codes, *International*

1  
2  
3 *Classifications of Diseases – 10<sup>th</sup> edition, Clinical Modification (ICD-10-CM) codes, or the*  
4 *Systematized Nomenclature of Medicine (SNOMED) diagnosis codes. The prescription drug file*  
5  
6 contained information about the medications used. The demographics, clinical diagnosis, and  
7  
8 prescription drug files were merged into one file using the encrypted patient medical record  
9  
10 number. The completeness and the validity of the data from EHR in this tertiary teaching  
11  
12 hospital in Saudi Arabia has not been studied before; however the researchers of this study  
13  
14 examined the completeness of this data and found that 91.0% of the patients had a complete data  
15  
16 (i.e., have information on the age, gender, marital status, nationality, encounter type, and clinical  
17  
18 diagnosis) and 85.0% of the patients had complete medication-related information.  
19  
20  
21  
22  
23  
24

## 25 **Study Population**

26  
27 The study population comprised of all adult patients with diabetes (Type I and Type II)  
28  
29 (age  $\geq 18$ -year) (n = 8,932) who received their treatment at the outpatient's setting in the tertiary  
30  
31 teaching hospital during a one-year period. No exclusion criteria were applied to the study  
32  
33 population.  
34  
35

## 36 **Measures**

### 37 ***Dependent Variable***

38  
39 In our study, the dependent variable was “polypharmacy use”. There are different  
40  
41 approaches in the literature to measure polypharmacy such as simultaneous, cumulative and  
42  
43 continuous. Also, there is no consensus on the thresholds regarding the number of medications  
44  
45 above which we consider the existence of polypharmacy.<sup>24</sup> In the current study, we defined  
46  
47 polypharmacy as the cumulative use of five or more medication classes during a one year period,  
48  
49 this threshold has been used more than others.<sup>21,24,25</sup> Using this definition, the prevalence of  
50  
51 polypharmacy among adults was measured by the sum of different medication classes  
52  
53  
54  
55  
56  
57  
58  
59  
60



1  
2  
3 administered over a twelve-month period. There is no consensus on the medications that should  
4 be included in the measurements of the polypharmacy. We have included all medication classes,  
5 including topical agents and vitamins in our definition.  
6  
7  
8  
9

### 10 11 12 ***Independent Variables*** 13

14 Independent variables included were age groups in years (18-29, 30-39, 40-49, 50-59,  
15  $\geq 60$ ), gender, nationality (Saudi, non-Saudi), marital status (married, unmarried), and  
16 documented chronic conditions which were classified into four categories (cardiovascular,  
17 musculoskeletal, respiratory, or mental health conditions) (Appendix I). Cardiovascular  
18 conditions composed of hypertension, ischemic heart disease, vascular heart disease, heart  
19 failure, hyperlipidemia, and stroke. Musculoskeletal conditions composed of osteoarthritis, and  
20 osteoporosis; respiratory conditions include asthma, and chronic obstructive pulmonary disease  
21 (COPD). Mental health conditions include dementia, depression, anxiety, and schizophrenia.  
22  
23 These conditions have been selected because they are highly prevalent among patients with  
24 diabetes and some of them were associated with polypharmacy use.<sup>5,26</sup>  
25  
26  
27  
28  
29  
30  
31  
32  
33  
34  
35  
36  
37  
38  
39

### 40 **Statistical Analysis** 41

42 Chi-square tests were used to examine the factors associated with polypharmacy use. A  
43 multivariable logistic regression was used to examine the factors associated with polypharmacy  
44 (i.e., use of  $\geq 5$  medication classes) after adjusting for age, sex, marital status, nationality, and  
45 co-existing chronic conditions. All statistical analyses were carried out using the Statistical  
46 analysis software, version 9.2 (SAS® 9.2).  
47  
48  
49  
50  
51  
52

### 53 **RESULTS** 54 55 56 57 58 59 60

1  
2  
3 A total of 8,832 adults patients were identified during the twelve-month period. The  
4 majority were female (62.2%), and 43.3% of the study population were elderly (age  $\geq 60$  years).  
5  
6 About half of the subjects (54.1%) had two or more diagnosed co-existing chronic health  
7  
8 conditions. Hypertension, dyslipidemia were among the most common chronic conditions in our  
9  
10 study population. Characteristics of the study population are presented in Table 1.  
11  
12  
13

#### 14 *Polypharmacy Use among Patients with Diabetes*

15  
16  
17 Overall 77.9 % of adults with diabetes were using five or more medication classes. The  
18  
19 study population characteristics by polypharmacy status are summarized in Table 2. This study  
20  
21 found a significantly higher percentage of polypharmacy among the elderly as compared to other  
22  
23 age groups, for example, as compared to patients with age between 18-29 (84.8% vs 37.4%, P-  
24  
25 value  $<0.001$ ). Women with diabetes had a significantly higher percentage of polypharmacy as  
26  
27 compared to men (81.7% vs. 71.6%, P-value  $<0.001$ ). Moreover, polypharmacy was significantly  
28  
29 higher among diabetes patients with two or more co-existing comorbid conditions versus those  
30  
31 with no co-existing chronic conditions (89.6% vs. 48.6%, P-value  $<0.001$ ). Looking at comorbid  
32  
33 conditions closely, polypharmacy was significantly higher among patients with cardiovascular  
34  
35 (54.7%), musculoskeletal (76.4%), respiratory (76.6%), and mental health conditions (77.2%) as  
36  
37 compared to those without those co-existing chronic conditions.  
38  
39  
40  
41  
42  
43  
44  
45  
46  
47  
48  
49  
50  
51  
52  
53  
54  
55  
56  
57  
58  
59  
60

### *Logistic Regression: Factors Associated with Polypharmacy*

The adjusted odds ratios (AOR) and 95% confidence intervals (CI) from multivariable logistic regression on polypharmacy are displayed in Table 3. Several factors were identified: age, gender, and co-existing chronic conditions. Polypharmacy was less likely among young adults as compared to the elderly. Women were more likely to have polypharmacy compared to men (AOR=1.60; 95% CI: 1.43-1.79). Polypharmacy was two times as likely among patients with co-existing cardiovascular disease (AOR=2.89; 95% CI: 2.54-3.29), mental health conditions (AOR=2.19; 95% CI: 1.74-2.76), and respiratory diseases (AOR=2.42; 95% CI: 1.92-3.03), and three times as likely among those with musculoskeletal disease (AOR=3.16; 95% CI: 2.31-4.30) compared to adults with diabetes and without these co-existing chronic conditions.

### **DISCUSSION**

Our study estimated the prevalence of polypharmacy among adults with diabetes in Saudi Arabia. In our study population, the rate of polypharmacy was high; nearly eighty percent of adults with diabetes used five or more medication classes. While this rate is within the documented rate in the literature among adults with diabetes 57% to 84%,<sup>9,20</sup> we could not find a study that reported the rate of polypharmacy among all age groups of adults with diabetes. We observed a higher rate of polypharmacy among the elderly as compared to all age groups. The very high rate of polypharmacy observed in our study population suggests that health care providers need to routinely monitor these individuals for potentially inappropriate medications, adverse drug events, and drug-drug interactions. Diabetes patients with polypharmacy may benefit from multidisciplinary collaborative care model that involves pharmacist follow up for the patients to assess the medication use. In an open-label, parallel-arm, randomized, controlled study, collaborative care has been associated with improvement in the management of diabetes

1  
2  
3 and reduction the healthcare cost.<sup>27</sup> Pharmacists can help other health care providers in detecting  
4 polypharmacy, drug interactions, and in providing recommendations for simplified medication  
5 regimens, and minimizing tablet-counts to enhance the outcome of diabetes care.  
6  
7

8  
9  
10 In our study population, co-existing chronic conditions were very common,<sup>28</sup> studies  
11 have shown that 90% of patients with diabetes had at least one additional chronic condition,<sup>5</sup> our  
12 study found that 86% of patients with diabetes had at least one co-existing chronic condition. It  
13 is plausible that we have very high rates of polypharmacy because 54% of adults in our study  
14 had multimorbidity (i.e. two or more co-existing chronic conditions). As a result, we found that  
15 polypharmacy rate was associated with the number of co-existing chronic conditions.<sup>5</sup> Although  
16 there is a well-documented literature on the relationship between the higher number of coexisting  
17 conditions and polypharmacy,<sup>5,20,29</sup> our study extended the literature by analyzing the association  
18 between type of chronic conditions and polypharmacy among patients with diabetes. We  
19 observed that the polypharmacy rates differed by the type of co-existing chronic conditions; with  
20 the highest use among those with musculoskeletal conditions.<sup>9</sup> This is not surprising because of  
21 the use of many vitamin supplements, and oral and topical medications to relieve the chronic  
22 pain. Further, we found a high rate of polypharmacy among adults with diabetes and co-existing  
23 cardiometabolic conditions as compared to adults without cardio-metabolic conditions which is  
24 consistent with the published literature among the elderly with cardiometabolic conditions  
25 cluster.<sup>30,31</sup>  
26  
27  
28  
29  
30  
31  
32  
33  
34  
35  
36  
37  
38  
39  
40  
41  
42  
43  
44  
45

46  
47 Women were more likely to have a polypharmacy compared to men, this is consistent  
48 with the findings from studies among patients with diabetes.<sup>20</sup> In addition, studies have reported  
49 that women in the general population have a higher use of prescribed and non-prescribed  
50 medications, and higher healthcare utilization as compared to men.<sup>32-35</sup> This could be as a result  
51  
52  
53  
54  
55  
56  
57  
58  
59  
60

1  
2  
3 of that women tend to be more concerned about their health and seek health services more often  
4  
5 than men.<sup>36</sup>  
6

7  
8 This study has some limitations; we used a 12-month period to measure multiple  
9  
10 medications use, which is not concurrent use and may have resulted in a very high rate of  
11  
12 multiple medications uses. We did not control for the severity of diabetes using the Diabetes  
13  
14 Complications Severity Index (DCSI) which may affect the rate of polypharmacy. We have also  
15  
16 only observed filled prescriptions and not actual use of the medications. By using the EHR data;  
17  
18 so we cannot eliminate some risk of bias; inaccurate information, or missing data related to the  
19  
20 use of EHR. Due to the cross-sectional nature of the data; it is difficult to assess the causal  
21  
22 relationship. People with the end of life care were included and this may have overestimated the  
23  
24 rate of polypharmacy. Moreover, we have included all medication classes, including the topical  
25  
26 agents, and vitamins in our definition, which may have overestimated the rate of polypharmacy.  
27  
28 It has to be noticed that not all polypharmacy is harmful; however, we have not assessed if the  
29  
30 polypharmacy was appropriate or not.  
31  
32  
33  
34  
35

36  
37 Despite these limitations, this study has many advantages such as the use of large sample  
38  
39 size, which allowed us to do a subgroup analysis to examine the polypharmacy use among the  
40  
41 elderly population. Furthermore, findings from this study added to the existing literature on the  
42  
43 prevalence of polypharmacy among all age groups and have identified the individuals who have  
44  
45 a high risk of polypharmacy. In addition, our results highlighted the need to routinely monitor  
46  
47 high-risk individuals for drug-related problems.  
48  
49  
50

## 51 **CONCLUSION**

52  
53 Polypharmacy is very common among adults with diabetes; particularly among  
54  
55 individuals with multiple chronic conditions. Those individuals may benefit from collaborative  
56  
57

1  
2  
3 care model that follow up the patients to assess the medication use. Also, health care providers  
4  
5 can help in reducing polypharmacy rate by providing recommendations to simplified treatment  
6  
7 regimens; thereby enhance the health outcomes of patients with diabetes.  
8  
9

### 10 **Ethics and Data Confidentiality**

11  
12 Confidentiality of the data was maintained throughout the research process. Retrieved data was  
13  
14 stored and saved as coded excel files. A customized formula was used to generate study  
15  
16 encrypted IDs assigned to each participant and replaced patients MRN's. Data extracted were  
17  
18 stored at the Research Unit at the tertiary hospital on secured, password protected, and limited  
19  
20 accessed computers.  
21  
22  
23

### 24 **Authors' contribution**

25  
26 Dr.Monira Alwhaibi, Dr.Bander Balkhi,Dr.Tariq Alhawassi,Dr.Hadeel Alkofide, Nouf  
27  
28 Alduhaim, Rawan Alabdulali, Hadeel Drweesh and Prof.Usha Sambamoorthi have all  
29  
30 participated in designing the study, drafting the manuscript, analysis, interpretation of the  
31  
32 findings, revising the manuscript content and gave final approval of the final version of this  
33  
34 manuscript.  
35  
36  
37

### 38 **Acknowledgement**

39  
40 This project was supported by King Saud University, Deanship of Scientific Research, Research  
41  
42 Chair.  
43  
44  
45

### 46 **Conflict of Interests**

47  
48 The authors declare that there is no conflict of interests regarding the publication of this paper.  
49  
50  
51  
52  
53  
54  
55  
56  
57  
58  
59  
60

## REFERENCES

1. Al-Nozha MM, Al-Maatouq MA, Al-Mazrou YY, Al-Harthi SS. Diabetes mellitus in Saudi Arabia. 2004.
2. Alqurashi KA, Aljabri KS, Bokhari SA. Prevalence of diabetes mellitus in a Saudi community. *Annals of Saudi medicine*. 2011;31(1):19.
3. Guariguata L, Whiting D, Hambleton I, Beagley J, Linnenkamp U, Shaw J. Global estimates of diabetes prevalence for 2013 and projections for 2035. *Diabetes research and clinical practice*. 2014;103(2):137-149.
4. Lozano R, Naghavi M, Foreman K, et al. Global and regional mortality from 235 causes of death for 20 age groups in 1990 and 2010: a systematic analysis for the Global Burden of Disease Study 2010. *The Lancet*. 2013;380(9859):2095-2128.
5. Teljeur C, Smith SM, Paul G, Kelly A, O'Dowd T. Multimorbidity in a cohort of patients with type 2 diabetes. *The European journal of general practice*. 2013;19(1):17-22.
6. Good CB. Polypharmacy in elderly patients with diabetes. *Diabetes Spectrum*. 2002;15(4):240-248.
7. Austin RP. Polypharmacy as a risk factor in the treatment of type 2 diabetes. *Diabetes Spectrum*. 2006;19(1):13-16.
8. Gadsby R, Galloway M, Barker P, Sinclair A. Prescribed medicines for elderly frail people with diabetes resident in nursing homes—issues of polypharmacy and medication costs. *Diabetic Medicine*. 2012;29(1):136-139.
9. Salih SB, Yousuf M, Durihim H, Almodaimegh H, Tamim H. Prevalence and associated factors of polypharmacy among adult Saudi medical outpatients at a tertiary care center. *Journal of family & community medicine*. 2013;20(3):162.

- 1  
2  
3 **10.** Monane M, Monane S, Semla T. Optimal medication use in elders. Key to successful  
4 aging. *Western Journal of Medicine*. 1997;167(4):233.  
5  
6
- 7 **11.** Bailey C, Kodack M. Patient adherence to medication requirements for therapy of type 2  
8 diabetes. *International journal of clinical practice*. 2011;65(3):314-322.  
9  
10
- 11 **12.** Willey CJ, Andrade SE, Cohen J, Fuller JC, Gurwitz JH. Polypharmacy with oral  
12 antidiabetic agents: an indicator of poor glycemic control. *American Journal of Managed*  
13 *Care*. 2006;12(8):435.  
14  
15
- 16 **13.** Peron EP, Ogbonna KC, Donohoe KL. Diabetic medications and polypharmacy. *Clinics*  
17 *in geriatric medicine*. 2015;31(1):17.  
18  
19
- 20 **14.** Breuker C, Abraham O, di Trapanie L, et al. Patients with diabetes are at high risk of  
21 serious medication errors at hospital: Interest of clinical pharmacist intervention to  
22 improve healthcare. *European journal of internal medicine*. 2017;38:38-45.  
23  
24
- 25 **15.** Rollason V, Vogt N. Reduction of polypharmacy in the elderly. *Drugs & aging*.  
26 2003;20(11):817-832.  
27  
28
- 29 **16.** Huang ES, Karter AJ, Danielson KK, Warton EM, Ahmed AT. The association between  
30 the number of prescription medications and incident falls in a multi-ethnic population of  
31 adult type-2 diabetes patients: the diabetes and aging study. *Journal of general internal*  
32 *medicine*. 2010;25(2):141-146.  
33  
34
- 35 **17.** Shah BM, Hajjar ER. Polypharmacy, adverse drug reactions, and geriatric syndromes.  
36 *Clinics in geriatric medicine*. 2012;28(2):173-186.  
37  
38
- 39 **18.** Maher RL, Hanlon J, Hajjar ER. Clinical consequences of polypharmacy in elderly.  
40 *Expert opinion on drug safety*. 2014;13(1):57-65.  
41  
42  
43  
44  
45  
46  
47  
48  
49  
50  
51  
52  
53  
54  
55  
56  
57  
58  
59  
60



- 1  
2  
3 **19.** Santibanez-Beltran S, Villarreal-Rios E, Galicia-Rodriguez L, Martinez-Gonzalez L,  
4 Vargas-Daza E, Ramos-López J. Economic cost of polypharmacy in the elderly in  
5 primary health care. *Revista medica del Instituto Mexicano del Seguro Social*.  
6  
7 2012;51(2):192-199.  
8  
9  
10  
11  
12 **20.** Noale M, Veronese N, Perin PC, et al. Polypharmacy in elderly patients with type 2  
13 diabetes receiving oral antidiabetic treatment. *Acta diabetologica*. 2016;53(2):323-330.  
14  
15  
16 **21.** Slabaugh SL, Maio V, Templin M, Abouzaid S. Prevalence and Risk of Polypharmacy  
17 among the Elderly in an Outpatient Setting. *Drugs & aging*. 2010;27(12):1019-1028.  
18  
19  
20  
21 **22.** Wright E, Stonehouse A, Cuddihy R. In support of an early polypharmacy approach to  
22 the treatment of type 2 diabetes. *Diabetes, Obesity and Metabolism*. 2010;12(11):929-  
23 940.  
24  
25  
26  
27  
28 **23.** Bauer S, Nauck M. Polypharmacy in people with Type 1 and Type 2 diabetes is justified  
29 by current guidelines—a comprehensive assessment of drug prescriptions in patients  
30 needing inpatient treatment for diabetes-associated problems. *Diabetic Medicine*.  
31 2014;31(9):1078-1085.  
32  
33  
34  
35  
36  
37 **24.** Monégat M, Sermet C, Perronnin M, Rococo E. Polypharmacy: definitions, measurement  
38 and stakes involved: review of the literature and measurement tests. *Quest d'économie la*  
39 *santé*. 2014;204:1-8.  
40  
41  
42  
43  
44 **25.** Grimmsmann T, Himmel W. Polypharmacy in primary care practices: an analysis using a  
45 large health insurance database. *Pharmacoepidemiology and drug safety*.  
46  
47 2009;18(12):1206-1213.  
48  
49  
50  
51  
52  
53  
54  
55  
56  
57  
58  
59  
60

- 1  
2  
3  
4  
5  
6  
7  
8  
9  
10  
11  
12  
13  
14  
15  
16  
17  
18  
19  
20  
21  
22  
23  
24  
25  
26  
27  
28  
29  
30  
31  
32  
33  
34  
35  
36  
37  
38  
39  
40  
41  
42  
43  
44  
45  
46  
47  
48  
49  
50  
51  
52  
53  
54  
55  
56  
57  
58  
59  
60
26. Iglay K, Hannachi H, Joseph Howie P, et al. Prevalence and co-prevalence of comorbidities among patients with type 2 diabetes mellitus. *Current medical research and opinion*. 2016;32(7):1243-1252.
  27. Siaw M. Collaborative care cost saving in Asian patients with T2DM. *Pharmacoeconomics & Outcomes News*. 2017;779:10-13.
  28. Caughey GE, Roughead EE, Vitry AI, McDermott RA, Shakib S, Gilbert AL. Comorbidity in the elderly with diabetes: Identification of areas of potential treatment conflicts. *Diabetes research and clinical practice*. 2010;87(3):385-393.
  29. Feng X, Tan X, Riley B, Zheng T, Bias T, Sambamoorthi U. Polypharmacy and Multimorbidity Among Medicaid Enrollees: A Multistate Analysis. *Population Health Management*. 2017.
  30. Nobili A, Marengoni A, Tettamanti M, et al. Association between clusters of diseases and polypharmacy in hospitalized elderly patients: results from the REPOSI study. *European journal of internal medicine*. 2011;22(6):597-602.
  31. Vyas A, Pan X, Sambamoorthi U. Chronic condition clusters and polypharmacy among adults. *International journal of family medicine*. 2012;2012.
  32. Qato DM, Alexander GC, Conti RM, Johnson M, Schumm P, Lindau ST. Use of prescription and over-the-counter medications and dietary supplements among older adults in the United States. *Jama*. 2008;300(24):2867-2878.
  33. Bertakis KD, Azari R, Helms LJ, Callahan EJ, Robbins JA. Gender differences in the utilization of health care services. *Journal of family practice*. 2000;49(2):147-147.

- 1  
2  
3 **34.** Redondo-Sendino Á, Guallar-Castillón P, Banegas JR, Rodríguez-Artalejo F. Gender  
4 differences in the utilization of health-care services among the older adult population of  
5 Spain. *BMC public health*. 2006;6(1):155.  
6  
7  
8  
9  
10 **35.** Loikas D, Wettermark B, von Euler M, Bergman U, Schenck-Gustafsson K. Differences  
11 in drug utilisation between men and women: a cross-sectional analysis of all dispensed  
12 drugs in Sweden. *BMJ open*. 2013;3(5):e002378.  
13  
14  
15  
16  
17 **36.** Venturini CD, Engroff P, Ely LS, et al. Gender differences, polypharmacy, and potential  
18 pharmacological interactions in the elderly. *Clinics*. 2011;66(11):1867-1872.  
19  
20  
21  
22  
23  
24  
25  
26  
27  
28  
29  
30  
31  
32  
33  
34  
35  
36  
37  
38  
39  
40  
41  
42  
43  
44  
45  
46  
47  
48  
49  
50  
51  
52  
53  
54  
55  
56  
57  
58  
59  
60

**Table 1**  
**Characteristics of the Study Population**  
**Adults with Diabetes**  
**Electronic Health Records Database, 2016**

|                                | N     | %     |
|--------------------------------|-------|-------|
| <b>Total</b>                   | 8,932 | 100.0 |
| <b>Age Group</b>               |       |       |
| 18-29                          | 198   | 2.2   |
| 30-39                          | 463   | 5.2   |
| 40-49                          | 1,226 | 13.7  |
| 50-59                          | 3,176 | 35.6  |
| =>60                           | 3,869 | 43.3  |
| <b>Marital Status</b>          |       |       |
| Single                         | 957   | 11.6  |
| Married                        | 7,310 | 88.4  |
| <b>Gender</b>                  |       |       |
| Male                           | 3,375 | 37.8  |
| Female                         | 5,557 | 62.2  |
| <b>Nationality</b>             |       |       |
| Saudi                          | 7,957 | 89.4  |
| Non-Saudi                      | 946   | 10.6  |
| <b>Cardiovascular</b>          |       |       |
| Yes                            | 7,209 | 80.7  |
| No                             | 1,723 | 19.3  |
| <b>Musculoskeletal</b>         |       |       |
| Yes                            | 787   | 8.8   |
| No                             | 8,145 | 91.2  |
| <b>Respiratory</b>             |       |       |
| Yes                            | 961   | 10.8  |
| No                             | 7,971 | 89.2  |
| <b>Mental</b>                  |       |       |
| Yes                            | 766   | 8.6   |
| No                             | 8,166 | 91.4  |
| <b># Chronic Conditions</b>    |       |       |
| Without co-existing conditions | 1250  | 14.0  |
| Single co-existing condition   | 2849  | 31.9  |
| ≥2 co-existing conditions      | 4833  | 54.1  |

Note: Study population comprised of 8,932 diabetic adults (Age ≥18year) who visited outpatient's clinics from a tertiary hospital in 2016

**Table 2**  
**Number and Row Percentage of Characteristics by Polypharmacy**  
**Adults with Diabetes,**  
**Electronic Health Records Database, 2016**

|                               | Polypharmacy |      | No Polypharmacy |      | Chisqval | chisqp | Sig |
|-------------------------------|--------------|------|-----------------|------|----------|--------|-----|
|                               | N            | %    | N               | %    |          |        |     |
| <b>ALL</b>                    | 6,957        | 77.9 | 1,975           | 22.1 |          |        |     |
| <b>Age Group</b>              |              |      |                 |      | 517.7    | 0.000  | *** |
| 18-29                         | 74           | 37.4 | 124             | 62.6 |          |        |     |
| 30-39                         | 253          | 54.6 | 210             | 45.4 |          |        |     |
| 40-49                         | 830          | 67.7 | 396             | 32.3 |          |        |     |
| 50-59                         | 2,521        | 79.4 | 655             | 20.6 |          |        |     |
| >=>60                         | 3,279        | 84.8 | 590             | 15.2 |          |        |     |
| <b>Marital Status</b>         |              |      |                 |      | 76.5     | 0.000  | *** |
| Single                        | 635          | 66.4 | 322             | 33.6 |          |        |     |
| Married                       | 5,769        | 78.9 | 1,541           | 21.1 |          |        |     |
| <b>Gender</b>                 |              |      |                 |      | 122.8    | 0.000  | *** |
| Male                          | 2,418        | 71.6 | 957             | 28.4 |          |        |     |
| Female                        | 4,539        | 81.7 | 1,018           | 18.3 |          |        |     |
| <b>Nationality</b>            |              |      |                 |      | 6.6      | 0.010  | **  |
| Saudi                         | 6,167        | 77.5 | 1,790           | 22.5 |          |        |     |
| Non-Saudi                     | 768          | 81.2 | 178             | 18.8 |          |        |     |
| <b>Cardiovascular</b>         |              |      |                 |      | 668.1    | 0.000  | *** |
| Yes                           | 6,015        | 83.4 | 1,194           | 16.6 |          |        |     |
| No                            | 942          | 54.7 | 781             | 45.3 |          |        |     |
| <b>Musculoskeletal</b>        |              |      |                 |      | 124.4    | 0.000  | *** |
| Yes                           | 737          | 93.6 | 50              | 6.4  |          |        |     |
| No                            | 6,220        | 76.4 | 1,925           | 23.6 |          |        |     |
| <b>Respiratory</b>            |              |      |                 |      | 76.8     | 0.000  | *** |
| Yes                           | 855          | 89.0 | 106             | 11.0 |          |        |     |
| No                            | 6,102        | 76.6 | 1,869           | 23.4 |          |        |     |
| <b>Mental</b>                 |              |      |                 |      | 27.3     | 0.000  | *** |
| Yes                           | 654          | 85.4 | 112             | 14.6 |          |        |     |
| No                            | 6,303        | 77.2 | 1,863           | 22.8 |          |        |     |
| <b># Chronic Conditions</b>   |              |      |                 |      | 1093.807 | 0.000  | *** |
| Without co-existing condition | 607          | 48.6 | 643             | 51.4 |          |        |     |
| Single co-existing condition  | 2,018        | 70.8 | 831             | 29.2 |          |        |     |
| ≥2 co-existing conditions     | 4,332        | 89.6 | 501             | 10.4 |          |        |     |

Note: Study population comprised of 8,932 adults with diabetes (age ≥18year) who visited outpatient's clinics from a tertiary hospital in 2016. Polypharmacy use was defined as the use of five or more medication classes during the one year period. Asterisks (\*) represent significant differences in polypharmacy from chi-square tests  
 \*\*\*P< .001

**Table 3**  
**Adjusted Odds Ratios (AOR) and 95% Confidence Intervals (CI)**  
**Logistic Regression on Polypharmacy**  
**Adults with Diabetes,**  
**Electronic Health Records database, 2016**

|                        | AOR  | 95% CI         | Sig. |
|------------------------|------|----------------|------|
| <b>Age Group</b>       |      |                |      |
| 18-29                  | 0.18 | [ 0.13 , 0.27] | ***  |
| 30-39                  | 0.31 | [ 0.24 , 0.39] | ***  |
| 40-49                  | 0.45 | [ 0.39 , 0.54] | ***  |
| 50-59                  | 0.73 | [ 0.64 , 0.84] | ***  |
| ≥60 (Ref.)             |      |                |      |
| <b>Marital Status</b>  |      |                |      |
| Single                 | 1.16 | [ 0.96 , 1.40] |      |
| Married (Ref.)         |      |                |      |
| <b>Gender</b>          |      |                |      |
| Female                 | 1.60 | [ 1.43 , 1.79] | ***  |
| Male (Ref.)            |      |                |      |
| <b>Nationality</b>     |      |                |      |
| Non-Saudi              | 1.81 | [ 1.50 , 2.19] | ***  |
| Saudi (Ref.)           |      |                |      |
| <b>Cardiovascular</b>  |      |                |      |
| Yes                    | 2.89 | [ 2.54 , 3.29] | ***  |
| No (Ref.)              |      |                |      |
| <b>Musculoskeletal</b> |      |                |      |
| Yes                    | 3.16 | [ 2.31 , 4.30] | ***  |
| No (Ref.)              |      |                |      |
| <b>Respiratory</b>     |      |                |      |
| Yes                    | 2.42 | [ 1.92 , 3.03] | ***  |
| No (Ref.)              |      |                |      |
| <b>Mental</b>          |      |                |      |
| Yes                    | 2.19 | [ 1.74 , 2.76] | ***  |
| No (Ref.)              |      |                |      |

Note: Based on 8,932 adults with diabetes, who visited outpatient's clinics from a tertiary hospital in 2016.

Polypharmacy use was defined as the use of five or more medication classes during the one year period.

Asterisks (\*) represent significant differences on polypharmacy use compared to the reference group based on logistic regression.

\*\*\*P< .001

Ref: Reference Group

**Appendix I**  
**Diagnoses codes used to identify the types of chronic conditions**  
**Electronic Health Records database, 2016**

| Type of Chronic Conditions        | ICD-9-CM Codes | ICD-10-CM Codes   | SNOMED Codes                                                                                                                                              |
|-----------------------------------|----------------|-------------------|-----------------------------------------------------------------------------------------------------------------------------------------------------------|
| <b>Cardiovascular Conditions</b>  |                |                   |                                                                                                                                                           |
| Diabetes                          | 250, 250.00    | E11, E11.9, E14.9 | 121589010, 502372015                                                                                                                                      |
| Hypertension                      | 401.9          | I10, I10          | 64176011, 2164904016                                                                                                                                      |
| Ischemic heart disease            |                | I25, I25.9        | 2534671011, 2537479013, 397667016, 2534663012                                                                                                             |
| Vascular heart disease            |                |                   | 1705016                                                                                                                                                   |
| Heart failure                     | 428.0, 428.1   | I50, I50.9        | 1234906013, 143156018, 251680018, 94251011, 2645367010, 18472010, 139475013, 2816764017, 493289014, 70653017, 80720010                                    |
| Hyperlipidemia                    |                | E78.5             | 92826017, 1209706018                                                                                                                                      |
| <b>Musculoskeletal Conditions</b> |                |                   |                                                                                                                                                           |
| osteoarthritis                    |                |                   | 1776248011, 359420013, 359421012, 1785522017                                                                                                              |
| Osteoporosis                      |                | M81.99            | 453855011, 107806013                                                                                                                                      |
| <b>Respiratory Conditions</b>     |                |                   |                                                                                                                                                           |
| Asthma                            | 493, 493.90    | J45               | 301485011, 301480018                                                                                                                                      |
| COPD                              |                | J44.1, J44.9      | 23290013, 23287019, 475431013, 475427019                                                                                                                  |
| <b>Mental Health Conditions</b>   |                |                   |                                                                                                                                                           |
| Dementia                          |                | F02               | 87274019                                                                                                                                                  |
| Depression                        | 311            | F31.3             | 486186018, 486187010, 110183011, 346973011, 346979010, 55208011, 454082014, 486187010, 124707013, 1208903011, 490537016, 346980013, 1228731019, 486184015 |
| Anxiety                           |                | F41.8, F41.9      | 346980013, 369987018, 303689015, 481155011, 81133019                                                                                                      |
| Schizophrenia                     |                | F20               | 114425016, 405368015, 294764011, 138883015, 96745016                                                                                                      |

ICD-9-CM codes: International Classifications of Diseases – 9th edition, Clinical Modification

ICD-10-CM codes: International Classifications of Diseases – 10th edition

SNOMED: Clinical Modification Systematized Nomenclature of Medicine

COPD: Chronic Obstructive Pulmonary Disease

# BMJ Open

## Polypharmacy among Patients with Diabetes: A Cross-Sectional Retrospective Study in a Tertiary Hospital in Saudi Arabia

|                                 |                                                                                                                                                                                                                                                                                                                                                                                                                                                                                                                                                                                                                                                                                                                                                                                                                                                           |
|---------------------------------|-----------------------------------------------------------------------------------------------------------------------------------------------------------------------------------------------------------------------------------------------------------------------------------------------------------------------------------------------------------------------------------------------------------------------------------------------------------------------------------------------------------------------------------------------------------------------------------------------------------------------------------------------------------------------------------------------------------------------------------------------------------------------------------------------------------------------------------------------------------|
| Journal:                        | <i>BMJ Open</i>                                                                                                                                                                                                                                                                                                                                                                                                                                                                                                                                                                                                                                                                                                                                                                                                                                           |
| Manuscript ID                   | bmjopen-2017-020852.R1                                                                                                                                                                                                                                                                                                                                                                                                                                                                                                                                                                                                                                                                                                                                                                                                                                    |
| Article Type:                   | Research                                                                                                                                                                                                                                                                                                                                                                                                                                                                                                                                                                                                                                                                                                                                                                                                                                                  |
| Date Submitted by the Author:   | 27-Feb-2018                                                                                                                                                                                                                                                                                                                                                                                                                                                                                                                                                                                                                                                                                                                                                                                                                                               |
| Complete List of Authors:       | Alwhaibi, Monira; King Saud University College of Pharmacy, Clinical Pharmacy; King Saud University, Medication Safety Research Chair Balkhi, Bander; King Saud University College of Pharmacy, Clinical Pharmacy; King Saud University, Medication Safety Research Chair Alhawassi, Tariq ; King Saud University College of Pharmacy, Clinical Pharmacy; King Saud University, Medication Safety Research Chair Alkofide, Hadeel; King Saud University College of Pharmacy, Clinical Pharmacy<br>Alduhaim, Nouf; King Saud University College of Pharmacy, Clinical Pharmacy<br>Alabdulaali, Rawan; King Saud University College of Pharmacy, Clinical Pharmacy<br>drweesh, hadeel ; King Saud University College of Pharmacy, Clinical Pharmacy<br>Sambamoorthi, Usha; West Virginia University Health Sciences Center, Pharmaceutical Systems & Policy |
| <b>Primary Subject Heading</b>: | Pharmacology and therapeutics                                                                                                                                                                                                                                                                                                                                                                                                                                                                                                                                                                                                                                                                                                                                                                                                                             |
| Secondary Subject Heading:      | Diabetes and endocrinology, Epidemiology, Health services research, Pharmacology and therapeutics                                                                                                                                                                                                                                                                                                                                                                                                                                                                                                                                                                                                                                                                                                                                                         |
| Keywords:                       | DIABETES & ENDOCRINOLOGY, Health & safety < HEALTH SERVICES ADMINISTRATION & MANAGEMENT, EPIDEMIOLOGY, Drug Use Evaluation                                                                                                                                                                                                                                                                                                                                                                                                                                                                                                                                                                                                                                                                                                                                |
|                                 |                                                                                                                                                                                                                                                                                                                                                                                                                                                                                                                                                                                                                                                                                                                                                                                                                                                           |

SCHOLARONE™  
Manuscripts



1  
2  
3 **Polypharmacy among Patients with Diabetes: A Cross-Sectional Retrospective Study in a**  
4 **Tertiary Hospital in Saudi Arabia**  
5

6 *Monira Alwhaibi, Ph.D<sup>1,2\*</sup>, Bander Balkhi, Pharm.D, Ph.D<sup>1,2</sup>, Tariq M. Alhawassi, Ph.D<sup>1,2,3</sup>,*  
7 *Hadeel Alkofide, PhD<sup>1</sup>, Nouf Alduhaim<sup>1</sup>, Rawan Alabdulali<sup>1</sup>, Hadeel Drweesh<sup>1</sup>, Usha*  
8 *Sambamoorthi, Ph.D<sup>4</sup>*  
9

10  
11  
12 <sup>1</sup> Department of Clinical Pharmacy, College of Pharmacy, King Saud University, Riyadh, Saudi  
13 Arabia

14 <sup>2</sup> Medication Safety Research Chair, College of Pharmacy, King Saud University, Riyadh, Saudi  
15 Arabia

16 <sup>3</sup> Pharmacy Services, King Saud University Medical City, Riyadh, Saudi Arabia

17 <sup>4</sup> Department of Pharmaceutical Systems and Policy, School of Pharmacy, West Virginia  
18 University, Morgantown, West Virginia  
19  
20

21  
22  
23  
24  
25  
26  
27  
28  
29  
30  
31  
32  
33  
34  
35 \*Corresponding author: Monira Alwhaibi, MS, PhD, Assistant Professor, Department of Clinical  
36 Pharmacy, King Saud University, College of Pharmacy, Riyadh, 11149, Phone: +966535384152,  
37 E-mail: malwhaibi@ksu.edu.sa  
38  
39  
40  
41  
42  
43  
44  
45  
46  
47  
48  
49  
50  
51  
52  
53  
54  
55  
56  
57  
58  
59  
60

## ABSTRACT

**Objectives.** Patients with diabetes are at high risk for polypharmacy (i.e. use of multiple medications) for treatment of diabetes, associated comorbidities, and other co-existing conditions. This study aims to estimate the prevalence of polypharmacy and factors associated with polypharmacy among adult patients with diabetes.

**Methods.** A cross-sectional retrospective observational study of adults with diabetes, who visited the outpatient clinic of a tertiary teaching hospital in Saudi Arabia, was conducted. Data were extracted from the Electronic Health Record (EHR) database for a period of twelve-month (January to December 2016). Polypharmacy was defined as the cumulative use of five or more medications. Polypharmacy among adults with diabetes was measured by calculating the average number of medications prescribed per patient. A multivariable logistic regression model was used to examine the factors associated with polypharmacy.

**Results.** A total of 8,932 adults with diabetes were included in this study. Of these, nearly 78 % had polypharmacy, which was more likely among women as compared to men and more likely among older adults (age  $\geq 60$  years) as compared to the adults. Also, polypharmacy was two times as likely among patients with coexisting cardiovascular conditions (AOR=2.89; 95% CI: 2.54-3.29), respiratory disease (AOR=2.42; 95% CI: 1.92-3.03), and mental health conditions (AOR=2.19; 95% CI: 1.74-2.76), and three times as likely among patients with co-existing musculoskeletal disease (AOR=3.16; 95% CI: 2.31-4.30) as compared to those without these co-existing chronic conditions categories.

**Conclusions.** Polypharmacy is common among patients with diabetes, with an even higher rate in older adults patients. Health care providers can help in detecting polypharmacy and in providing recommendations for simplifying medication regimens and minimizing medications to enhance the outcome of diabetes care.

**Keywords.** Diabetes; Polypharmacy; Chronic conditions; Electronic health records; Drug use evaluation.

### Strengths and limitations of this study

- This study has provided a real insight into the current prevalence and predictors of polypharmacy among patients with diabetes in Saudi Arabia including a large study population of patients with diabetes.
- Around nine-thousand patients were included in this study, which allowed us to identify the prevalence of polypharmacy among a subgroup of patients.
- This study has not controlled for the severity of diabetes using the Diabetes Complications Severity Index (DCSI) which may affect the rate of polypharmacy.
- This study used a twelve-month period to measure multiple medications use, which is not concurrent use and may have resulted in a very high rate of multiple medications uses.
- By using the EHR data; so we cannot eliminate some risk of bias; inaccurate information, or missing data related to the use of EHR.
- It has to be noticed that not all polypharmacy is harmful; however, future studies to assess inappropriate medications associated with polypharmacy is warranted

## INTRODUCTION

Diabetes is a highly prevalent chronic condition among adults in Saudi Arabia; between 21-24% of adults are estimated to have diabetes.<sup>1,2</sup> It is projected that 27% of adults in Saudi Arabia will have diabetes by 2035.<sup>3</sup> Diabetes is one of the top ten causes of morbidity and mortality worldwide.<sup>4</sup> Patients with diabetes often have co-existing chronic health conditions such as hypertension, dyslipidemia, coronary artery disease, depression and chronic kidney disease, which requires the use of multiple medications to treat those co-existing chronic conditions.<sup>5</sup> All of this put patients with diabetes at high risk of polypharmacy,<sup>6,7</sup> with an estimated prevalence of 57% to 84% of patients with diabetes using five or more medications.<sup>8</sup> A study among adults with diabetes in the US documented that the 54% of adults with diabetes have polypharmacy.<sup>9</sup> A multicenter cross-sectional survey conducted in Italy reported that 57% of patients with diabetes use five or more medications.<sup>10</sup> In addition, polypharmacy was reported among 84% older adults patients with diabetes.<sup>8</sup> In Saudi Arabia, a cross-sectional study among 766 adults who visited outpatient's clinic at a tertiary care center, reported that the prevalence of polypharmacy among patients with diabetes was 71%.<sup>11</sup>

An examination of polypharmacy among patients with diabetes is important because polypharmacy increases the probability of the adverse drug events<sup>12,13</sup>, drug-drug interactions<sup>14</sup>, duplication of therapy,<sup>15</sup> decreases compliance to antidiabetic medications,<sup>16</sup> and poor glycemic control.<sup>17</sup> The presence of polypharmacy is also associated with prescribing cascade, in which adverse drug events are misinterpreted as new medical conditions which can result in the prescription of new medications to treat those conditions.<sup>18</sup> Polypharmacy has other negative health consequences such as increased risk of

1  
2  
3 hospitalization and medication error,<sup>19,20</sup> higher risk of fall,<sup>21</sup> poor functional status,<sup>22</sup> poor  
4 quality of life, and high healthcare cost.<sup>23,24</sup> Polypharmacy among diabetes patients is often  
5 associated with many factors. These include age,<sup>11</sup> sex,<sup>10</sup> co-existing conditions,<sup>10</sup> rurality,  
6  
7  
8  
9  
10  
11  
12  
13  
14  
15  
16  
17  
18  
19  
20  
21  
22  
23  
24  
25  
26  
27  
28  
29  
30  
31  
32  
33  
34  
35  
36  
37  
38  
39  
40  
41  
42  
43  
44  
45  
46  
47  
48  
49  
50  
51  
52  
53  
54  
55  
56  
57  
58  
59  
60

25,11 diabetes complications<sup>10</sup>, and aggressive diabetes treatment.<sup>26,27</sup>

To date, limited studies have examined the prevalence of polypharmacy among adults with diabetes living in Saudi Arabia on a large scale, and assessed the specific factors that put patients at risk of polypharmacy. Identifying the prevalence and the subgroup of patients at high risk of polypharmacy will facilitate pharmacovigilance efforts in clinical practice settings. Therefore, the primary objective of this observational study is to examine the prevalence of polypharmacy among adults with diabetes in Saudi Arabia and to identify the factors that are associated with polypharmacy, specifically the association between co-existing chronic conditions and polypharmacy.

## METHODS

### Study Design

A cross-sectional retrospective observational study was conducted in a tertiary teaching hospital in Saudi Arabia. This hospital is one of the largest tertiary teaching hospitals in Riyadh, Saudi Arabia, with a 1200-bed facility and all general and subspecialty medical services. The hospital provides primary, secondary, and tertiary care services. The patient population is composed predominantly of local citizens as well as residents, from northern region in Riyadh; the hospital also serves the entire country as a referral center.

## Data Source and Data Extraction

This study used data retrieved from the Electronic Health Record (EHR) database for the period from 1<sup>st</sup> January 2016, until 30<sup>th</sup> December 2016. Institutional review board (IRB) at King Saud University Medical City approval was obtained to conduct the study (IRB number: E-17-2601). Strict confidentiality of the data was maintained throughout the research process. The data from EHR were derived from demographics file, clinical diagnosis file, and prescription drug file. The demographics file contained information about the patients' date of birth, gender, marital status, nationality, and encounter type. The clinical diagnosis file provided information about the clinical diagnosis from inpatient and outpatient visits. Physicians reported clinical diagnosis using the *International Classifications of Diseases – 9<sup>th</sup> edition, Clinical Modification* (ICD-9-CM) codes, *International Classifications of Diseases – 10<sup>th</sup> edition, Clinical Modification* (ICD-10-CM) codes, or the *Systematized Nomenclature of Medicine* (SNOMED) diagnosis codes. The prescription drug file contained information about the medications used. The demographics, clinical diagnosis, and prescription drug files were merged into one file using the encrypted patient medical record number. The completeness and the validity of the data from EHR in this tertiary teaching hospital in Saudi Arabia has not been studied before; however the researchers of this study examined the completeness of this data and found that 91.0% of the patients had a complete data (i.e., have information on the age, gender, marital status, nationality, encounter type, and clinical diagnosis) and 85.0% of the patients had complete medication-related information.

## Study Population

The study population comprised of all adult patients with diabetes (Type I and Type II) (age  $\geq 18$ -year) (n = 8,932) who received their treatment at the outpatient's setting in the tertiary teaching hospital during a one-year period. No exclusion criteria were applied to the study population.

## Patient and Public Involvement

This study used a retrospective data for patients who visited a tertiary hospital in Riyadh; therefore patients were not involved in the design of this study.

## Measures

### *Dependent Variable*

In our study, the dependent variable was "polypharmacy". There are different approaches in the literature to measure polypharmacy such as simultaneous, cumulative and continuous. Also, there is no consensus on the thresholds regarding the number of medications above which we consider the existence of polypharmacy.<sup>28</sup> In the current study, we defined polypharmacy as the cumulative use of five or more medications during a one year period, this threshold has been used more than others.<sup>25,28,29</sup> Using this definition, the prevalence of polypharmacy among adults was measured by the sum of unique therapeutic medication classes administered over a twelve-month period. There is no consensus on the medications that should be included in the measurements of the polypharmacy. Also, all the prescription and the non-prescription/Over the Counter (OTC) medications categories were included in our definition of polypharmacy.

### ***Independent Variables***

Independent variables included were age groups in years (18-29, 30-39, 40-49, 50-59,  $\geq 60$ ), gender, nationality (Saudi, non-Saudi), marital status (married, unmarried), and documented chronic conditions which were classified into five categories (cardiovascular, chronic kidney disease, musculoskeletal, respiratory, or mental health conditions) (Appendix I). Cardiovascular conditions composed of hypertension, ischemic heart disease, vascular heart disease, stroke, heart failure, and dyslipidemia. Musculoskeletal conditions composed of osteoarthritis, and osteoporosis; respiratory conditions include asthma, and chronic obstructive pulmonary disease (COPD). Mental health conditions include dementia, depression, anxiety, and schizophrenia. These conditions have been selected because they are highly prevalent among patients with diabetes and some of them were associated with polypharmacy.<sup>5,30</sup>

### **Statistical Analysis**

Frequency and percentage were used to describe the categorical variables (age, sex, marital status, nationality, co-existing chronic conditions, and polypharmacy). Mean and Standard deviation were used to describe continuous variables. Chi-square tests were used to examine the factors associated with polypharmacy. A multivariable logistic regression was used to examine the factors associated with polypharmacy (i.e., use of  $\geq 5$  medications) after adjusting for age, sex, marital status, nationality, and co-existing chronic conditions. All statistical analyses were carried out using the Statistical analysis software, version 9.2 (SAS® 9.2).

### **RESULTS**

A total of 8,932 adult patients were identified during the twelve-month period. The majority were Saudi (89.4%), female (62.2%), and 43.3% of the study population were older



1  
2  
3 adults (age  $\geq 60$  years), the mean age of the study population was 57 years old. About half of the  
4  
5 subjects (54.1%) had two or more diagnosed co-existing chronic health conditions.

6  
7  
8 Hypertension, dyslipidemia, asthma, osteoarthritis, and anxiety were among the most common  
9  
10 chronic conditions in our study population. Characteristics of the study population are presented  
11  
12 in Table 1.

### 13 14 *Polypharmacy among Patients with Diabetes*

15  
16  
17 Overall 77.9 % of adults with diabetes were using five or more medications. Also, when  
18  
19 we identified the rate of polypharmacy (i.e, taking 10 or more medications) we found that 17.2%  
20  
21 of adults have a hyperpolypharmacy. The most commonly used medications in our study  
22  
23 population were antidiabetic medications (81.4%), followed by nonsteroidal anti-inflammatory  
24  
25 drugs (72.4%) and antihyperlipidemic agents (68.8%) (Table 2).

26  
27  
28 The study population characteristics by polypharmacy status are summarized in Table 1.  
29  
30 This study found a significantly higher percentage of polypharmacy among older adults as  
31  
32 compared to other age groups, for example, as compared to patients with age between 18-29  
33  
34 (84.8% vs 37.4%, P-value  $< 0.001$ ). Women with diabetes had a significantly higher percentage  
35  
36 of polypharmacy as compared to men (81.7% vs. 71.6%, P-value  $< 0.001$ ). Moreover,  
37  
38 polypharmacy was significantly higher among diabetes patients with two or more co-existing  
39  
40 comorbid conditions versus those with no co-existing chronic conditions (89.6% vs. 48.6%, P-  
41  
42 value  $< 0.001$ ). Looking at comorbid conditions closely, polypharmacy was significantly higher  
43  
44 among patients with cardiovascular (83.4%, P-value  $< 0.001$ ), chronic kidney disease (95.2%, P-  
45  
46 value  $< 0.001$ ), musculoskeletal (93.6%, P-value  $< 0.001$ ), respiratory (89.0%, P-value  $< 0.001$ ),  
47  
48 and mental health conditions (85.4%, P-value  $< 0.001$ ) as compared to those without those co-  
49  
50 existing chronic conditions.  
51  
52  
53  
54  
55  
56  
57  
58  
59  
60

### *Logistic Regression: Factors Associated with Polypharmacy*

The adjusted odds ratios (AOR) and 95% confidence intervals (CI) from multivariable logistic regression on polypharmacy are displayed in Table 3. Several factors were identified: age, gender, and co-existing chronic conditions. Polypharmacy was less likely among young adults as compared to older adults. Women were more likely to have polypharmacy compared to men (AOR=1.60; 95% CI: 1.43-1.79). Patients with co-existing cardiovascular conditions were two times more likely to have polypharmacy (AOR=2.89; 95% CI: 2.54-3.29), those with mental health conditions were two times more likely to have polypharmacy (AOR=2.19; 95% CI: 1.74-2.76), patients with respiratory diseases were two times more likely to have polypharmacy (AOR=2.42; 95% CI: 1.92-3.03), and those with musculoskeletal disease were three times more likely to have polypharmacy (AOR=3.16; 95% CI: 2.31-4.30) as compared to adults with diabetes and without these co-existing chronic conditions.

## **DISCUSSION**

Our study was set out to examine the prevalence of polypharmacy among adults with diabetes in Saudi Arabia. In this large sample of subjects with diabetes, the rate of polypharmacy was high, as nearly four out of five adults with diabetes were prescribed five or more medications. Similar rates were reported in the literature among patients with diabetes 54-84%,<sup>8-10</sup> however, to our knowledge, no study has attempted to measure the rate of polypharmacy among all age groups of adults with diabetes, which is a major contribution of our study. A higher rate of polypharmacy among older individuals (age 60 and above) as compared to all age groups was also observed in this study. Studies among adults in the general population have reported that older adults (defined as age  $\geq 60$  or age  $\geq 65$  years) have a higher risk of

1  
2  
3 polypharmacy use as compared to adults.<sup>31,32</sup> One possible reason for the high rate of  
4  
5 polypharmacy among this population is the coexistence of other chronic conditions.  
6

7  
8 Furthermore, a noteworthy finding of the current study is the high prevalence of chronic  
9  
10 conditions and the higher rate of polypharmacy among diabetic individuals with co-existing  
11  
12 chronic conditions. Previous studies have shown that 90% of patients with diabetes had at least  
13  
14 one co-existing chronic condition,<sup>5</sup> our study found that 86% of patients with diabetes had at  
15  
16 least one co-existing chronic condition. It is plausible that the high rate of polypharmacy in this  
17  
18 study is potentially associated with the number of comorbidities among the study population.  
19  
20 The finding of this study support that diabetic patients with multiple chronic conditions were at  
21  
22 higher risk of polypharmacy.<sup>5,33</sup> Although there is a well-documented literature on the  
23  
24 relationship between the higher number of coexisting conditions and polypharmacy,<sup>5,10,34</sup> our  
25  
26 study extended the literature by analyzing the association between the type of chronic conditions  
27  
28 and polypharmacy. We observed that the polypharmacy rates differed by the type of co-existing  
29  
30 chronic conditions; with the highest use among those with musculoskeletal conditions. This is  
31  
32 not surprising because individuals with musculoskeletal conditions such as osteoarthritis use  
33  
34 analgesic and non-steroidal anti-inflammatory drugs (NSAIDs) to relieve the chronic pain. We  
35  
36 also observed that patients with cluster of diseases (diabetes and cardiovascular conditions) have  
37  
38 a higher rate of polypharmacy as compared to adults without the cluster of diseases which is  
39  
40 consistent with the published literature.<sup>31,35</sup> Patients with diabetes and mental health conditions  
41  
42 have also a high rate of polypharmacy as compared to those without mental health conditions.  
43  
44  
45  
46  
47  
48  
49 Further studies are required to explore the contributing factors, as there is no supporting evidence  
50  
51 in the literature. Polypharmacy was also highly prevalent among diabetic patients with  
52  
53 respiratory conditions, which is consistent with data from previous studies, which showed higher  
54  
55  
56  
57  
58  
59  
60

1  
2  
3 rates of medication use in patients with COPD.<sup>36</sup>  
4

5 Accordingly, health care providers need to routinely monitor these individuals for  
6 potentially inappropriate medications, adverse drug events, and drug-drug interactions. For  
7 instance, in older individuals, comprehensive geriatric assessment has shown effective impact in  
8 decreasing the number of medications prescribed.<sup>37</sup> Further, patients with diabetes and  
9 polypharmacy may benefit from multidisciplinary collaborative care model that involves  
10 pharmacist follow up for the patients to assess the medication use and minimize polypharmacy.  
11 In an open-label, parallel-arm, randomized, controlled study, collaborative care has been  
12 associated with improvement in the management of diabetes and reduction the healthcare cost.<sup>38</sup>  
13 Pharmacists can help other healthcare providers in detecting polypharmacy, drug interactions,  
14 and in providing recommendations for simplified medication regimens and minimizing  
15 medications to positively impact health outcomes of diabetes care.<sup>39,40</sup>  
16  
17  
18  
19  
20  
21  
22  
23  
24  
25  
26  
27  
28  
29  
30

31 We also looked at other related factors for polypharmacy, and we observed that women  
32 were more likely to have a polypharmacy compared to men, this is consistent with the findings  
33 from data among patients with diabetes.<sup>10</sup> In addition, studies have reported that women in the  
34 general population have a higher use of prescribed and non-prescribed medications, and higher  
35 healthcare utilization as compared to men.<sup>41-44</sup> This could be because women tend to be more  
36 concerned about their health and seek health services more often than men.<sup>45</sup>  
37  
38  
39  
40  
41  
42  
43  
44

#### 45 **Strengths and limitations**

46  
47 This study has some limitations; we used a twelve-month period to measure multiple  
48 medications use, which is not concurrent use and may have resulted in a very high rate of  
49 multiple medications uses. We did not control for the severity of diabetes using the Diabetes  
50 Complications Severity Index (DCSI), which may affect the rate of polypharmacy. We have also  
51  
52  
53  
54  
55  
56  
57  
58  
59  
60

1  
2  
3 only observed filled prescriptions and not actual use of the medications. By using the EHR data,  
4  
5 we cannot eliminate some risk of bias; inaccurate information, or missing data related to the use  
6  
7 of EHR. Due to the cross-sectional nature of the data, it is difficult to assess any causal  
8  
9 relationships. People with the end of life care were included in the study, which may have also  
10  
11 overestimated the rate of polypharmacy.<sup>46</sup> Moreover, we have included all therapeutic  
12  
13 medication classes, including over the counter medications and vitamins in our definition, which  
14  
15 may have overestimated the rate of polypharmacy. It has to be noticed that not all polypharmacy  
16  
17 is harmful; however, we have not assessed if the polypharmacy was appropriate or not. This  
18  
19 study was conducted in a tertiary hospital in Riyadh; therefore, the findings from this study  
20  
21 cannot be generalized to primary care settings or to other regions in Saudi Arabia. In addition,  
22  
23 we cannot exclude selection-bias; patients included in this study may be sicker, have sever  
24  
25 diabetes, and higher rates of comorbidities as compared to individuals seen in primary care  
26  
27 settings.  
28  
29  
30  
31  
32  
33

34 Despite these limitations, this study has many advantages such as the use of large sample  
35  
36 size, which allowed us to identify the prevalence of polypharmacy among a subgroup of patients.  
37  
38 Furthermore, findings from this study added to the existing literature on the prevalence of  
39  
40 polypharmacy among all age groups and identified the individuals who have a high risk of  
41  
42 polypharmacy based on their comorbidities. In addition, our results highlighted the need for  
43  
44 routine monitoring of high-risk individuals for drug-related problems. Therefore, future studies  
45  
46 are required to identify the rate of polypharmacy among other healthcare settings and assess the  
47  
48 impact of pharmacist-led interventions on the rate of polypharmacy in patients with diabetes.  
49  
50  
51  
52  
53  
54  
55  
56  
57  
58  
59  
60

## CONCLUSION

Polypharmacy is very common among adults with diabetes; particularly among individuals with multiple chronic conditions. Older adults patients have a higher rate of polypharmacy, which could be due to the increased number of multiple chronic conditions in this population. Moreover, patients with co-existing cardiovascular, mental and musculoskeletal chronic conditions are at a high risk of polypharmacy. Individuals with diabetes may benefit from simplified treatment regimens; thereby enhancing the health outcomes of this population.

### **Ethics and Data Confidentiality**

Confidentiality of the data was maintained throughout the research process. Data extracted were stored at the Research Unit at the tertiary hospital on secured, password protected, and limited accessed computers. An encrypted identification was assigned to each participant and replaced patients' medical record number.

### **Authors' contribution**

Dr.Monira Alwhaibi, Dr.Bander Balkhi,Dr.Tariq Alhawassi,Dr.Hadeel Alkofide, Nouf Alduhaim, Rawan Alabdulali, Hadeel Drweesh and Prof.Usha Sambamoorthi have all participated in designing the study, drafting the manuscript, analysis, interpretation of the findings, revising the manuscript content and gave final approval of the final version of this manuscript.

**Acknowledgement:** The project was fully supported financially by the Vice Deanship of Research Chairs, King Saud University Riyadh, Saudi Arabia.

**Conflict of Interests:** The authors declare that there is no conflict of interests regarding the publication of this paper.

## REFERENCES

1. Al-Nozha MM, Al-Maatouq MA, Al-Mazrou YY, et al. Diabetes mellitus in Saudi Arabia. *Saudi medical journal*. 2004;25(11):1603-1610.
2. Alqurashi KA, Aljabri KS, Bokhari SA. Prevalence of diabetes mellitus in a Saudi community. *Annals of Saudi medicine*. 2011;31(1):19.
3. Guariguata L, Whiting D, Hambleton I, Beagley J, Linnenkamp U, Shaw J. Global estimates of diabetes prevalence for 2013 and projections for 2035. *Diabetes research and clinical practice*. 2014;103(2):137-149.
4. Lozano R, Naghavi M, Foreman K, et al. Global and regional mortality from 235 causes of death for 20 age groups in 1990 and 2010: a systematic analysis for the Global Burden of Disease Study 2010. *The Lancet*. 2013;380(9859):2095-2128.
5. Teljeur C, Smith SM, Paul G, Kelly A, O'Dowd T. Multimorbidity in a cohort of patients with type 2 diabetes. *The European journal of general practice*. 2013;19(1):17-22.
6. Good CB. Polypharmacy in elderly patients with diabetes. *Diabetes Spectrum*. 2002;15(4):240-248.
7. Austin RP. Polypharmacy as a risk factor in the treatment of type 2 diabetes. *Diabetes Spectrum*. 2006;19(1):13-16.
8. Gadsby R, Galloway M, Barker P, Sinclair A. Prescribed medicines for elderly frail people with diabetes resident in nursing homes—issues of polypharmacy and medication costs. *Diabetic Medicine*. 2012;29(1):136-139.
9. Grant RW, Devita NG, Singer DE, Meigs JB. Polypharmacy and medication adherence in patients with type 2 diabetes. *Diabetes care*. 2003;26(5):1408-1412.
10. Noale M, Veronese N, Perin PC, et al. Polypharmacy in elderly patients with type 2 diabetes receiving oral antidiabetic treatment. *Acta diabetologica*. 2016;53(2):323-330.
11. Salih SB, Yousuf M, Durihim H, Almodaimagh H, Tamim H. Prevalence and associated factors of polypharmacy among adult Saudi medical outpatients at a tertiary care center. *Journal of family & community medicine*. 2013;20(3):162.
12. Nguyen JK, Fouts MM, Kotabe SE, Lo E. Polypharmacy as a risk factor for adverse drug reactions in geriatric nursing home residents. *The American journal of geriatric pharmacotherapy*. 2006;4(1):36-41.
13. Viktil KK, Blix HS, Moger TA, Reikvam A. Polypharmacy as commonly defined is an indicator of limited value in the assessment of drug-related problems. *British journal of clinical pharmacology*. 2007;63(2):187-195.
14. Rodrigues MCS, Oliveira Cd. Drug-drug interactions and adverse drug reactions in polypharmacy among older adults: an integrative review. *Revista latino-americana de enfermagem*. 2016;24.
15. Golchin N, Frank SH, Vince A, Isham L, Meropol SB. Polypharmacy in the elderly. *Journal of research in pharmacy practice*. 2015;4(2):85.
16. Bailey C, Kodack M. Patient adherence to medication requirements for therapy of type 2 diabetes. *International journal of clinical practice*. 2011;65(3):314-322.
17. Willey CJ, Andrade SE, Cohen J, Fuller JC, Gurwitz JH. Polypharmacy with oral antidiabetic agents: an indicator of poor glycemic control. *American Journal of Managed Care*. 2006;12(8):435.
18. Peron EP, Ogbonna KC, Donohoe KL. Diabetic medications and polypharmacy. *Clinics in geriatric medicine*. 2015;31(1):17.



19. Breuker C, Abraham O, di Trapanie L, et al. Patients with diabetes are at high risk of serious medication errors at hospital: Interest of clinical pharmacist intervention to improve healthcare. *European journal of internal medicine*. 2017;38:38-45.
20. Rollason V, Vogt N. Reduction of polypharmacy in the elderly. *Drugs & aging*. 2003;20(11):817-832.
21. Huang ES, Karter AJ, Danielson KK, Warton EM, Ahmed AT. The association between the number of prescription medications and incident falls in a multi-ethnic population of adult type-2 diabetes patients: the diabetes and aging study. *Journal of general internal medicine*. 2010;25(2):141-146.
22. Shah BM, Hajjar ER. Polypharmacy, adverse drug reactions, and geriatric syndromes. *Clinics in geriatric medicine*. 2012;28(2):173-186.
23. Maher RL, Hanlon J, Hajjar ER. Clinical consequences of polypharmacy in elderly. *Expert opinion on drug safety*. 2014;13(1):57-65.
24. Santibanez-Beltran S, Villarreal-Rios E, Galicia-Rodriguez L, Martinez-Gonzalez L, Vargas-Daza E, Ramos-López J. Economic cost of polypharmacy in the elderly in primary health care. *Revista medica del Instituto Mexicano del Seguro Social*. 2012;51(2):192-199.
25. Slabaugh SL, Maio V, Templin M, Abouzaid S. Prevalence and Risk of Polypharmacy among the Elderly in an Outpatient Setting. *Drugs & aging*. 2010;27(12):1019-1028.
26. Wright E, Stonehouse A, Cuddihy R. In support of an early polypharmacy approach to the treatment of type 2 diabetes. *Diabetes, Obesity and Metabolism*. 2010;12(11):929-940.
27. Bauer S, Nauck M. Polypharmacy in people with Type 1 and Type 2 diabetes is justified by current guidelines—a comprehensive assessment of drug prescriptions in patients needing inpatient treatment for diabetes—associated problems. *Diabetic Medicine*. 2014;31(9):1078-1085.
28. Monégat M, Sermet C, Perronnin M, Rococo E. Polypharmacy: definitions, measurement and stakes involved: review of the literature and measurement tests. *Quest d'économie la santé*. 2014;204:1-8.
29. Grimmsmann T, Himmel W. Polypharmacy in primary care practices: an analysis using a large health insurance database. *Pharmacoepidemiology and drug safety*. 2009;18(12):1206-1213.
30. Iglay K, Hannachi H, Joseph Howie P, et al. Prevalence and co-prevalence of comorbidities among patients with type 2 diabetes mellitus. *Current medical research and opinion*. 2016;32(7):1243-1252.
31. Vyas A, Pan X, Sambamoorthi U. Chronic condition clusters and polypharmacy among adults. *International journal of family medicine*. 2012;2012.
32. Balkhi B, AlQahtani N, Alwhaibi M, et al. Prevalence and Factors Associated With Polypharmacy Use Among Adult Patients in Saudi Arabia. *Journal of patient safety*. 2017.
33. Lewis NJ, Bugdalski-Stutrud C, Abate MA, Blommel M, Wu C-H, Gaither CA. The Medication Assessment Program: comprehensive medication assessments for persons taking multiple medications for chronic diseases. *Journal of the American Pharmacists Association*. 2008;48(2):171-180.



- 1
  - 2
  - 3
  - 4
  - 5
  - 6
  - 7
  - 8
  - 9
  - 10
  - 11
  - 12
  - 13
  - 14
  - 15
  - 16
  - 17
  - 18
  - 19
  - 20
  - 21
  - 22
  - 23
  - 24
  - 25
  - 26
  - 27
  - 28
  - 29
  - 30
  - 31
  - 32
  - 33
  - 34
  - 35
  - 36
  - 37
  - 38
  - 39
  - 40
  - 41
  - 42
  - 43
  - 44
  - 45
  - 46
  - 47
  - 48
  - 49
  - 50
  - 51
  - 52
  - 53
  - 54
  - 55
  - 56
  - 57
  - 58
  - 59
  - 60
34. Feng X, Tan X, Riley B, Zheng T, Bias T, Sambamoorthi U. Polypharmacy and Multimorbidity Among Medicaid Enrollees: A Multistate Analysis. *Population Health Management*. 2017.
35. Nobili A, Marengoni A, Tettamanti M, et al. Association between clusters of diseases and polypharmacy in hospitalized elderly patients: results from the REPOSI study. *European journal of internal medicine*. 2011;22(6):597-602.
36. Franssen FM, Spruit MA, Wouters EF. Determinants of polypharmacy and compliance with GOLD guidelines in patients with chronic obstructive pulmonary disease. *International journal of chronic obstructive pulmonary disease*. 2011;6:493.
37. Sergi G, De Rui M, Sarti S, Manzato E. Polypharmacy in the elderly. *Drugs & aging*. 2011;28(7):509-518.
38. Siaw M. Collaborative care cost saving in Asian patients with T2DM. *Pharmacoeconomics & Outcomes News*. 2017;779:10-13.
39. Chumney EC, Robinson LC. The effects of pharmacist interventions on patients with polypharmacy. *Pharmacy Practice*. 2006;4(3):103.
40. Wang Y, Yeo Q, Ko Y. Economic evaluations of pharmacist-managed services in people with diabetes mellitus: a systematic review. *Diabetic Medicine*. 2016;33(4):421-427.
41. Qato DM, Alexander GC, Conti RM, Johnson M, Schumm P, Lindau ST. Use of prescription and over-the-counter medications and dietary supplements among older adults in the United States. *Jama*. 2008;300(24):2867-2878.
42. Bertakis KD, Azari R, Helms LJ, Callahan EJ, Robbins JA. Gender differences in the utilization of health care services. *Journal of family practice*. 2000;49(2):147-147.
43. Redondo-Sendino Á, Guallar-Castillón P, Banegas JR, Rodríguez-Artalejo F. Gender differences in the utilization of health-care services among the older adult population of Spain. *BMC public health*. 2006;6(1):155.
44. Loikas D, Wettermark B, von Euler M, Bergman U, Schenck-Gustafsson K. Differences in drug utilisation between men and women: a cross-sectional analysis of all dispensed drugs in Sweden. *BMJ open*. 2013;3(5):e002378.
45. Venturini CD, Engroff P, Ely LS, et al. Gender differences, polypharmacy, and potential pharmacological interactions in the elderly. *Clinics*. 2011;66(11):1867-1872.
46. Maddison AR, Fisher J, Johnston G. Preventive medication use among persons with limited life expectancy. *Progress in palliative care*. 2011;19(1):15-21.

**Table 1**  
**Characteristics of the Study Population**  
**Number and Row Percentage of Characteristics by Polypharmacy among Adults with**  
**Diabetes**

| <b>Electronic Health Records Database, 2016</b> |              |          |                     |          |                        |          |                 |             |
|-------------------------------------------------|--------------|----------|---------------------|----------|------------------------|----------|-----------------|-------------|
|                                                 | <b>Total</b> |          | <b>Polypharmacy</b> |          | <b>No Polypharmacy</b> |          | <b>chisqval</b> | <b>Sig.</b> |
|                                                 | <b>N</b>     | <b>%</b> | <b>N</b>            | <b>%</b> | <b>N</b>               | <b>%</b> |                 |             |
| <b>Total</b>                                    | 8,932        | 100.0    | 6,957               | 77.9     | 1,975                  | 22.1     |                 |             |
| <b># of Medications</b>                         |              |          |                     |          |                        |          |                 |             |
| <b>Mean(SD)</b>                                 | 6.54 (3.50)  |          | 8.06 (2.97)         |          | 2.85 (1.14)            |          |                 |             |
| Age Mean (SD)                                   | 57.7(12.12)  |          | 59.7 (11.3)         |          | 52.7(12.68)            |          |                 |             |
| <b>Age Group</b>                                |              |          |                     |          |                        |          | 517.7           | ***         |
| 18-29                                           | 198          | 2.2      | 74                  | 37.4     | 124                    | 62.6     |                 |             |
| 30-39                                           | 463          | 5.2      | 253                 | 54.6     | 210                    | 45.4     |                 |             |
| 40-49                                           | 1,226        | 13.7     | 830                 | 67.7     | 396                    | 32.3     |                 |             |
| 50-59                                           | 3,176        | 35.6     | 2,521               | 79.4     | 655                    | 20.6     |                 |             |
| 60-69                                           | 2,434        | 27.3     | 1,909               | 78.4     | 525                    | 21.6     |                 |             |
| 70-79                                           | 1,126        | 12.6     | 951                 | 84.5     | 175                    | 15.5     |                 |             |
| =>80                                            | 309          | 3.5      | 269                 | 87.1     | 40                     | 12.9     |                 |             |
| <b>Marital Status</b>                           |              |          |                     |          |                        |          | 76.5            | ***         |
| single                                          | 957          | 11.6     | 635                 | 66.4     | 322                    | 33.6     |                 |             |
| Married                                         | 7,310        | 88.4     | 5,769               | 78.9     | 1,541                  | 21.1     |                 |             |
| <b>Gender</b>                                   |              |          |                     |          |                        |          | 122.8           | ***         |
| Male                                            | 3,375        | 37.8     | 2,418               | 71.6     | 957                    | 28.4     |                 |             |
| Female                                          | 5,557        | 62.2     | 4,539               | 81.7     | 1,018                  | 18.3     |                 |             |
| <b>Nationality</b>                              |              |          |                     |          |                        |          | 6.6             | **          |
| Saudi                                           | 7,957        | 89.4     | 6,167               | 77.5     | 1,790                  | 22.5     |                 |             |
| Non-Saudi                                       | 946          | 10.6     | 768                 | 81.2     | 178                    | 18.8     |                 |             |
| <b>Chronic kidney disease</b>                   |              |          |                     |          |                        |          | 25.8            | ***         |
| Yes                                             | 146          | 1.6      | 139                 | 95.2     | 7                      | 4.8      |                 |             |
| No                                              | 8,786        | 98.4     | 6,818               | 77.6     | 1,968                  | 22.4     |                 |             |
| <b>Cardiovascular Conditions</b>                |              |          |                     |          |                        |          | 668.1           | ***         |
| Yes                                             | 7,209        | 80.7     | 6,015               | 83.4     | 1,194                  | 16.6     |                 |             |
| No                                              | 1,723        | 19.3     | 942                 | 54.7     | 781                    | 45.3     |                 |             |
| <b>Musculoskeletal Conditions</b>               |              |          |                     |          |                        |          | 124.4           | ***         |
| Yes                                             | 787          | 8.8      | 737                 | 93.6     | 50                     | 6.4      |                 |             |
| No                                              | 8,145        | 91.2     | 6,220               | 76.4     | 1,925                  | 23.6     |                 |             |
| <b>Respiratory Conditions</b>                   |              |          |                     |          |                        |          | 76.8            | ***         |
| Yes                                             | 961          | 10.8     | 855                 | 89.0     | 106                    | 11.0     |                 |             |
| No                                              | 7,971        | 89.2     | 6,102               | 76.6     | 1,869                  | 23.4     |                 |             |
| <b>Mental Health Conditions</b>                 |              |          |                     |          |                        |          | 27.3            | ***         |

**Table 1**  
**Characteristics of the Study Population**  
**Number and Row Percentage of Characteristics by Polypharmacy among Adults with**  
**Diabetes**

**Electronic Health Records Database, 2016**

|                              | Total |      | Polypharmacy |      | No Polypharmacy |      | chisqval | Sig.       |
|------------------------------|-------|------|--------------|------|-----------------|------|----------|------------|
|                              | N     | %    | N            | %    | N               | %    |          |            |
| Yes                          | 766   | 8.6  | 654          | 85.4 | 112             | 14.6 |          |            |
| No                           | 8,166 | 91.4 | 6,303        | 77.2 | 1,863           | 22.8 |          |            |
| <b># Chronic Conditions</b>  |       |      |              |      |                 |      | 1093.807 | <b>***</b> |
| No co-existing conditions    | 1250  | 14.0 | 607          | 48.6 | 643             | 51.4 |          |            |
| Single co-existing condition | 2849  | 31.9 | 2,018        | 70.8 | 831             | 29.2 |          |            |
| ≥2 co-existing conditions    | 4833  | 54.1 | 4,332        | 89.6 | 501             | 10.4 |          |            |

Note: Study population comprised of 8,932 adults with diabetes (age ≥18year) who visited outpatient's clinics from a tertiary hospital in 2016. Polypharmacy was defined as the use of five or more medications during the one year period.

Asterisks (\*) represent significant differences in polypharmacy from chi-square tests ; \*\*\*P< .001

**Table 2**  
**Most Prevalent Therapeutic Classes among the Study**  
**Population (n = 8,932)**

| <b>Medication Therapy Class</b>           | <b>N</b> | <b>%</b> |
|-------------------------------------------|----------|----------|
| Oral Antidiabetic Agent                   | 7,270    | 81.4     |
| Nonsteroidal Anti-inflammatory Drugs      | 6,467    | 72.4     |
| Antihyperlipidemic agents                 | 6,144    | 68.8     |
| Proton Pump Inhibitor                     | 2,540    | 28.4     |
| Angiotensin Converting Enzyme Inhibitor   | 2,321    | 25.9     |
| Injectable Antidiabetic Agent             | 2,253    | 25.2     |
| Calcium Channel Blocker                   | 2,162    | 24.2     |
| Corticosteroid , Local                    | 1,892    | 21.1     |
| Diuretic                                  | 1,934    | 21.6     |
| Beta-Adrenergic Blocker, Beta-1 Selective | 1,806    | 20.2     |
| Angiotensin II Receptor Blocker           | 1,796    | 20.1     |
| Thyroid Analog                            | 1,355    | 15.1     |
| Histamine H2 Blocker                      | 822      | 9.2      |
| Anticoagulants                            | 706      | 7.9      |
| Corticosteroid , Systemic                 | 600      | 6.7      |
| Antiplatelet                              | 357      | 4.0      |

**Table 1**  
**Characteristics of the Study Population**  
**Number and Row Percentage of Characteristics by Polypharmacy among Adults with**  
**Diabetes**

**Electronic Health Records Database, 2016**

|  | Total |   | Polypharmacy |   | No Polypharmacy |   | chisqval | Sig. |
|--|-------|---|--------------|---|-----------------|---|----------|------|
|  | N     | % | N            | % | N               | % |          |      |

**Table 3**  
**Adjusted Odds Ratios (AOR) and 95% Confidence Intervals (CI)**  
**Logistic Regression on Polypharmacy**  
**Adults with Diabetes,**  
**Electronic Health Records database, 2016**

|                                   | AOR  | 95% CI         | Sig. |
|-----------------------------------|------|----------------|------|
| <b>Age Group</b>                  |      |                |      |
| 18-29 vs. $\geq 80$               | 0.10 | [ 0.06 , 0.18] | ***  |
| 30-39 vs. $\geq 80$               | 0.15 | [ 0.10 , 0.24] | ***  |
| 40-49 vs. $\geq 80$               | 0.22 | [ 0.15 , 0.33] | ***  |
| 50-59 vs. $\geq 80$               | 0.37 | [ 0.25 , 0.54] | ***  |
| 60-69 vs. $\geq 80$               | 0.53 | [ 0.36 , 0.79] | **   |
| 70-79 vs. $\geq 80$               | 0.79 | [ 0.52 , 1.20] |      |
| <b>Marital Status</b>             |      |                |      |
| Single vs. Married                | 1.16 | [ 0.96 , 1.40] |      |
| <b>Gender</b>                     |      |                |      |
| Female vs. Male                   | 1.60 | [ 1.43 , 1.79] | ***  |
| <b>Nationality</b>                |      |                |      |
| Non-Saudi vs. Saudi               | 1.81 | [ 1.50 , 2.19] | ***  |
| <b>Cardiovascular Conditions</b>  |      |                |      |
| Yes vs. No                        | 2.89 | [ 2.54 , 3.29] | ***  |
| <b>Musculoskeletal Conditions</b> |      |                |      |
| Yes vs. No                        | 3.16 | [ 2.31 , 4.30] | ***  |
| <b>Respiratory Conditions</b>     |      |                |      |
| Yes vs. No                        | 2.42 | [ 1.92 , 3.03] | ***  |
| <b>Mental Health Conditions</b>   |      |                |      |
| Yes Vs. No                        | 2.19 | [ 1.74 , 2.76] | ***  |

Note: Based on 8,932 adults with diabetes, who visited outpatient's clinics from a tertiary hospital in 2016. Polypharmacy was defined as the use of five or more medications during the one year period.

1  
2  
3  
4  
5  
6  
7  
8  
9  
10  
11  
12  
13  
14  
15  
16  
17  
18  
19  
20  
21  
22  
23  
24  
25  
26  
27  
28  
29  
30  
31  
32  
33  
34  
35  
36  
37  
38  
39  
40  
41  
42  
43  
44  
45  
46  
47  
48  
49  
50  
51  
52  
53  
54  
55  
56  
57  
58  
59  
60

Asterisks (\*) represent significant differences on polypharmacy compared to the reference group based on logistic regression.

\*\*\*P< .001

Ref: Reference Group

For peer review only

**Appendix I**  
**Diagnoses codes used to identify the types of chronic conditions**  
**Electronic Health Records database, 2016**

| Type of Chronic Conditions        | ICD-9-CM Codes | ICD-10-CM Codes   | SNOMED Codes                                                                                                                                              |
|-----------------------------------|----------------|-------------------|-----------------------------------------------------------------------------------------------------------------------------------------------------------|
| <b>Diabetes</b>                   | 250, 250.00    | E11, E11.9, E14.9 | 121589010, 502372015                                                                                                                                      |
| <b>Cardiovascular Conditions</b>  |                |                   |                                                                                                                                                           |
| Hypertension                      | 401.9          | I10, 10           | 64176011, 2164904016                                                                                                                                      |
| Ischemic heart disease            |                | I25, I25.9        | 2534671011, 2537479013, 397667016, 2534663012                                                                                                             |
| Vascular heart disease            |                |                   | 1705016                                                                                                                                                   |
| Stroke                            |                | I64               | 2644233012, 2476091017, 345636015, 345682011                                                                                                              |
| Heart failure                     | 428.0, 428.1   | I50, I50.9        | 1234906013, 143156018, 251680018, 94251011, 2645367010, 18472010, 139475013, 2816764017, 493289014, 70653017, 80720010                                    |
| Dyslipidemia                      |                | E78.5             | 92826017, 1209706018                                                                                                                                      |
| <b>Musculoskeletal Conditions</b> |                |                   |                                                                                                                                                           |
| osteoarthritis                    |                |                   | 1776248011, 359420013, 359421012, 1785522017                                                                                                              |
| Osteoporosis                      |                | M81.99            | 453855011, 107806013                                                                                                                                      |
| <b>Respiratory Conditions</b>     |                |                   |                                                                                                                                                           |
| Asthma                            | 493, 493.90    | J45               | 301485011, 301480018                                                                                                                                      |
| COPD                              |                | J44.1, J44.9      | 23290013, 23287019, 475431013, 475427019                                                                                                                  |
| <b>Mental Health Conditions</b>   |                |                   |                                                                                                                                                           |
| Dementia                          |                | F02               | 87274019                                                                                                                                                  |
| Depression                        | 311            | F31.3             | 486186018, 486187010, 110183011, 346973011, 346979010, 55208011, 454082014, 486187010, 124707013, 1208903011, 490537016, 346980013, 1228731019, 486184015 |
| Anxiety                           |                | F41.8, F41.9      | 346980013, 369987018, 303689015, 481155011, 81133019                                                                                                      |
| Schizophrenia                     |                | F20               | 114425016, 405368015, 294764011, 138883015, 96745016                                                                                                      |

ICD-9-CM codes: International Classifications of Diseases – 9th edition, Clinical Modification

ICD-10-CM codes: International Classifications of Diseases – 10th edition

SNOMED: Clinical Modification Systematized Nomenclature of Medicine

COPD: Chronic Obstructive Pulmonary Disease

STROBE Statement—checklist of items that should be included in reports of observational studies

|                           | <b>Item No.</b> | <b>Recommendation</b>                                                                               | <b>Page No.</b> | <b>Relevant text from manuscript</b>                                                                                                                                                                                                                                                                                                                                                                                                                                                                                                                                                                                                                                                                                                                                                                                                                                                                                                                                                                                                                                                                                                                                                                                                                                                                                                                                                                    |
|---------------------------|-----------------|-----------------------------------------------------------------------------------------------------|-----------------|---------------------------------------------------------------------------------------------------------------------------------------------------------------------------------------------------------------------------------------------------------------------------------------------------------------------------------------------------------------------------------------------------------------------------------------------------------------------------------------------------------------------------------------------------------------------------------------------------------------------------------------------------------------------------------------------------------------------------------------------------------------------------------------------------------------------------------------------------------------------------------------------------------------------------------------------------------------------------------------------------------------------------------------------------------------------------------------------------------------------------------------------------------------------------------------------------------------------------------------------------------------------------------------------------------------------------------------------------------------------------------------------------------|
| <b>Title and abstract</b> | 1               | (a) Indicate the study’s design with a commonly used term in the title or the abstract              | 1               | Polypharmacy Use among Patients with Diabetes: A Cross-Sectional Retrospective Study in a Tertiary Hospital in Saudi Arabia                                                                                                                                                                                                                                                                                                                                                                                                                                                                                                                                                                                                                                                                                                                                                                                                                                                                                                                                                                                                                                                                                                                                                                                                                                                                             |
|                           |                 | (b) Provide in the abstract an informative and balanced summary of what was done and what was found | 2               | A cross-sectional retrospective observational study of adults with diabetes, who visited the outpatient clinic of a tertiary teaching hospital in Saudi Arabia, was conducted. Data were extracted from the Electronic Health Record (EHR) database for a period of twelve-month (January to December 2016). Polypharmacy was defined as the cumulative use of five or more medication classes. Polypharmacy among adults with diabetes was measured by calculating the average number of medication classes prescribed per patient. A multivariable logistic regression model was used to examine the factors associated with polypharmacy after adjusting for age, sex, marital status, nationality, and co-existing chronic conditions. A total of 8,932 adults with diabetes were included in this study. Of these, nearly 78 % had polypharmacy, which was more likely among women as compared to men and more likely among the elderly (age ≥ 60 years) as compared to the adults. Also, polypharmacy was two times as likely among patients with coexisting cardiovascular disease (AOR=2.89; 95% CI: 2.54-3.29), respiratory disease (AOR=2.42; 95% CI: 1.92-3.03), and mental health conditions (AOR=2.19; 95% CI: 1.74-2.76), and three times as likely among patients with co-existing musculoskeletal disease as compared to those without these co-existing chronic conditions categories. |
| <b>Introduction</b>       |                 |                                                                                                     |                 |                                                                                                                                                                                                                                                                                                                                                                                                                                                                                                                                                                                                                                                                                                                                                                                                                                                                                                                                                                                                                                                                                                                                                                                                                                                                                                                                                                                                         |
| Background/rationale      | 2               | Explain the scientific background and rationale for the investigation being reported                | 4               | Diabetes is a highly prevalent chronic condition among adults in Saudi Arabia; between 21-24% of adults are estimated to have diabetes. It is projected that 27% of adults in Saudi Arabia will have diabetes by 2035.                                                                                                                                                                                                                                                                                                                                                                                                                                                                                                                                                                                                                                                                                                                                                                                                                                                                                                                                                                                                                                                                                                                                                                                  |

|                |   |                                                                                                                                                                                                                                                                                                                                  |     |                                                                                                                                                                                                                                                                                                                                                                                                                                                                                                                       |
|----------------|---|----------------------------------------------------------------------------------------------------------------------------------------------------------------------------------------------------------------------------------------------------------------------------------------------------------------------------------|-----|-----------------------------------------------------------------------------------------------------------------------------------------------------------------------------------------------------------------------------------------------------------------------------------------------------------------------------------------------------------------------------------------------------------------------------------------------------------------------------------------------------------------------|
|                |   |                                                                                                                                                                                                                                                                                                                                  |     | Diabetes is one of the top ten causes of morbidity and mortality worldwide. Patients with diabetes often have co-existing chronic health conditions such as hypertension, dyslipidemia, coronary artery disease, depression and renal disease, which require the use of multiple medications to treat those co-existing chronic conditions. All of this put patients with diabetes at high risk of polypharmacy, with an estimated prevalence of 57% to 84% of patients with diabetes using five or more medications. |
|                |   |                                                                                                                                                                                                                                                                                                                                  |     | Limited studies have examined the prevalence of polypharmacy among adults with diabetes living in Saudi Arabia on a large scale, and looking at specific factors that put patients at risk of polypharmacy. Identifying the prevalence and the subgroup of patients at high risk of polypharmacy will facilitate pharmacovigilance efforts in clinical practice settings.                                                                                                                                             |
| Objectives     | 3 | State specific objectives, including any prespecified hypotheses                                                                                                                                                                                                                                                                 | 5   | The primary objective of this study is to examine the prevalence of polypharmacy among adults with diabetes in Saudi Arabia and to identify the factors that are associated with polypharmacy, specifically the association between co-existing chronic conditions and polypharmacy.                                                                                                                                                                                                                                  |
| <b>Methods</b> |   |                                                                                                                                                                                                                                                                                                                                  |     |                                                                                                                                                                                                                                                                                                                                                                                                                                                                                                                       |
| Study design   | 4 | Present key elements of study design early in the paper                                                                                                                                                                                                                                                                          | 5   | A cross-sectional retrospective observational study was conducted in a tertiary teaching hospital in Saudi Arabia                                                                                                                                                                                                                                                                                                                                                                                                     |
| Setting        | 5 | Describe the setting, locations, and relevant dates, including periods of recruitment, exposure, follow-up, and data collection                                                                                                                                                                                                  | 5,6 | Outpatient's setting in the tertiary teaching hospital during a one-year period. From 1 <sup>st</sup> January 2016, until 30 <sup>th</sup> December 2016. The study population comprised of all adult patients with diabetes (Type I and Type II) (age $\geq$ 18-year) (n = 8,932). This study used data retrieved from the Electronic Health Record (EHR). The data from EHR were derived from demographics file, clinical diagnosis file, and prescription drug file.                                               |
| Participants   | 6 | (a) <i>Cohort study</i> —Give the eligibility criteria, and the sources and methods of selection of participants. Describe methods of follow-up<br><i>Case-control study</i> —Give the eligibility criteria, and the sources and methods of case ascertainment and control selection. Give the rationale for the choice of cases | 6   | The study population comprised of all adult patients with diabetes (Type I and Type II) (age $\geq$ 18-year) (n = 8,932) who received their treatment at the outpatient's setting in the tertiary teaching hospital during a one-year period.                                                                                                                                                                                                                                                                         |



1  
2  
3  
4  
5  
6  
7  
8  
9  
10  
11  
12  
13  
14  
15  
16  
17  
18  
19  
20  
21  
22  
23  
24  
25  
26  
27  
28  
29  
30  
31  
32  
33  
34  
35  
36  
37  
38  
39  
40  
41  
42  
43  
44  
45  
46  
47

|                              |    |                                                                                                                                                                                      |     |                                                                                                                                                                                                                                                                                                                                                                                                                                                                                                                                                                                                                                                                                                                                                                                                                                                                                                                                                                                                                                                                                                                                                                                                                                                                                      |
|------------------------------|----|--------------------------------------------------------------------------------------------------------------------------------------------------------------------------------------|-----|--------------------------------------------------------------------------------------------------------------------------------------------------------------------------------------------------------------------------------------------------------------------------------------------------------------------------------------------------------------------------------------------------------------------------------------------------------------------------------------------------------------------------------------------------------------------------------------------------------------------------------------------------------------------------------------------------------------------------------------------------------------------------------------------------------------------------------------------------------------------------------------------------------------------------------------------------------------------------------------------------------------------------------------------------------------------------------------------------------------------------------------------------------------------------------------------------------------------------------------------------------------------------------------|
|                              |    | and controls                                                                                                                                                                         |     | No exclusion criteria were applied to the study population.                                                                                                                                                                                                                                                                                                                                                                                                                                                                                                                                                                                                                                                                                                                                                                                                                                                                                                                                                                                                                                                                                                                                                                                                                          |
|                              |    | <i>Cross-sectional study</i> —Give the eligibility criteria, and the sources and methods of selection of participants                                                                |     |                                                                                                                                                                                                                                                                                                                                                                                                                                                                                                                                                                                                                                                                                                                                                                                                                                                                                                                                                                                                                                                                                                                                                                                                                                                                                      |
|                              |    | <i>(b) Cohort study</i> —For matched studies, give matching criteria and number of exposed and unexposed                                                                             |     |                                                                                                                                                                                                                                                                                                                                                                                                                                                                                                                                                                                                                                                                                                                                                                                                                                                                                                                                                                                                                                                                                                                                                                                                                                                                                      |
|                              |    | <i>Case-control study</i> —For matched studies, give matching criteria and the number of controls per case                                                                           |     |                                                                                                                                                                                                                                                                                                                                                                                                                                                                                                                                                                                                                                                                                                                                                                                                                                                                                                                                                                                                                                                                                                                                                                                                                                                                                      |
| Variables                    | 7  | Clearly define all outcomes, exposures, predictors, potential confounders, and effect modifiers. Give diagnostic criteria, if applicable                                             | 6,7 | <p>The dependent variable was “polypharmacy use”. There are different approaches in the literature to measure polypharmacy such as simultaneous, cumulative and continuous. Also, there is no consensus on the thresholds regarding the number of medications above which we consider the existence of polypharmacy. In the current study, we defined polypharmacy as the cumulative use of five or more medications during a one year period, this threshold has been used more than others. Using this definition, the prevalence of polypharmacy among adults was measured by the sum of unique therapeutic medication classes administered over a twelve-month period. There is no consensus on the medications that should be included in the measurements of the polypharmacy. Also, all the prescription and the non-prescription/Over the Counter (OTC) medications categories were included in our definition of polypharmacy.</p> <p>Independent variables included were age groups in years (18-29, 30-39, 40-49, 50-59, ≥60), gender, nationality (Saudi, non-Saudi), marital status (married, unmarried), and documented chronic conditions which were classified into four categories (cardiovascular, musculoskeletal, respiratory, or mental health conditions).</p> |
| Data sources/<br>measurement | 8* | For each variable of interest, give sources of data and details of methods of assessment (measurement). Describe comparability of assessment methods if there is more than one group | 6,7 | <p>The prevalence of polypharmacy among adults was measured by the sum of different medication classes administered over a twelve-month period.</p> <p>Chronic conditions were identified using the the clinical diagnosis file which</p>                                                                                                                                                                                                                                                                                                                                                                                                                                                                                                                                                                                                                                                                                                                                                                                                                                                                                                                                                                                                                                            |

1  
2  
3  
4  
5  
6  
7  
8  
9  
10  
11  
12  
13  
14  
15  
16  
17  
18  
19  
20  
21  
22  
23  
24  
25  
26  
27  
28  
29  
30  
31  
32  
33  
34  
35  
36  
37  
38  
39  
40  
41  
42  
43  
44  
45  
46  
47

|            |    |                                                           |    |                                                                                                                                                                                                                                                                                                                                                                                                                                                                |
|------------|----|-----------------------------------------------------------|----|----------------------------------------------------------------------------------------------------------------------------------------------------------------------------------------------------------------------------------------------------------------------------------------------------------------------------------------------------------------------------------------------------------------------------------------------------------------|
|            |    |                                                           |    | provided information about the clinical diagnosis from inpatient and outpatient visits. Physicians reported clinical diagnosis using the <i>International Classifications of Diseases – 9<sup>th</sup> edition, Clinical Modification</i> (ICD-9-CM) codes, <i>International Classifications of Diseases – 10<sup>th</sup> edition, Clinical Modification</i> (ICD-10-CM) codes, or the <i>Systematized Nomenclature of Medicine</i> (SNOMED) diagnosis codes. |
| Bias       | 9  | Describe any efforts to address potential sources of bias | 11 | By using the EHR data; we cannot eliminate some risk of bias; inaccurate information, or missing data related to the use of EHR.                                                                                                                                                                                                                                                                                                                               |
| Study size | 10 | Explain how the study size was arrived at                 | 6  | The study population comprised of all adult patients with diabetes (Type I and Type II) (age ≥18-year) (n = 8,932) who received their treatment at the outpatient’s setting in the tertiary teaching hospital during a one-year period. We have included all diabetic adults who visited a tertiary teaching hospital during one year period.                                                                                                                  |

Continued on next page

For peer review only

|                        |     |                                                                                                                                                                                                                                                                                                           |    |                                                                                                                                                                                                                                                                                                                                                                                                                                                                                                                                                                       |
|------------------------|-----|-----------------------------------------------------------------------------------------------------------------------------------------------------------------------------------------------------------------------------------------------------------------------------------------------------------|----|-----------------------------------------------------------------------------------------------------------------------------------------------------------------------------------------------------------------------------------------------------------------------------------------------------------------------------------------------------------------------------------------------------------------------------------------------------------------------------------------------------------------------------------------------------------------------|
| Quantitative variables | 11  | Explain how quantitative variables were handled in the analyses. If applicable, describe which groupings were chosen and why                                                                                                                                                                              | 7  | Age groups in years (18-29, 30-39, 40-49, 50-59, ≥60), gender, nationality (Saudi, non-Saudi), marital status (married, unmarried), and documented chronic conditions which were classified into four categories (cardiovascular, musculoskeletal, respiratory, or mental health conditions).                                                                                                                                                                                                                                                                         |
| Statistical methods    | 12  | (a) Describe all statistical methods, including those used to control for confounding                                                                                                                                                                                                                     | 7  | Frequency and percentage were used to describe the categorical variables (age, sex, marital status, nationality, co-existing chronic conditions, and polypharmacy). Mean and Standard deviation were used to describe continuous variables. Chi-square tests were used to examine the factors associated with polypharmacy use. A multivariable logistic regression was used to examine the factors associated with polypharmacy (i.e., use of ≥ 5 medication classes) after adjusting for age, sex, marital status, nationality, and co-existing chronic conditions. |
|                        |     | (b) Describe any methods used to examine subgroups and interactions                                                                                                                                                                                                                                       | 11 | Not Applicable                                                                                                                                                                                                                                                                                                                                                                                                                                                                                                                                                        |
|                        |     | (c) Explain how missing data were addressed                                                                                                                                                                                                                                                               | 11 | For all the variables, the sum add up to the total study population and we did not have missing data.                                                                                                                                                                                                                                                                                                                                                                                                                                                                 |
|                        |     | (d) <i>Cohort study</i> —If applicable, explain how loss to follow-up was addressed<br><i>Case-control study</i> —If applicable, explain how matching of cases and controls was addressed<br><i>Cross-sectional study</i> —If applicable, describe analytical methods taking account of sampling strategy |    | Our study design was cross-sectional data in nature, we have include all adults who visited a tertiary teaching hospital with diabetes diagnosis without sampling strategy.                                                                                                                                                                                                                                                                                                                                                                                           |
|                        |     | (e) Describe any sensitivity analyses                                                                                                                                                                                                                                                                     |    | Not Applicable                                                                                                                                                                                                                                                                                                                                                                                                                                                                                                                                                        |
| <b>Results</b>         |     |                                                                                                                                                                                                                                                                                                           |    |                                                                                                                                                                                                                                                                                                                                                                                                                                                                                                                                                                       |
| Participants           | 13* | (a) Report numbers of individuals at each stage of study—eg numbers potentially eligible, examined for eligibility, confirmed eligible, included in the study, completing follow-up, and analysed                                                                                                         | 6  | n = 8,932                                                                                                                                                                                                                                                                                                                                                                                                                                                                                                                                                             |
|                        |     | (b) Give reasons for non-participation at each stage                                                                                                                                                                                                                                                      |    | Not Applicable                                                                                                                                                                                                                                                                                                                                                                                                                                                                                                                                                        |
|                        |     | (c) Consider use of a flow diagram                                                                                                                                                                                                                                                                        |    |                                                                                                                                                                                                                                                                                                                                                                                                                                                                                                                                                                       |
| Descriptive data       | 14* | (a) Give characteristics of study participants (eg demographic, clinical, social) and information on exposures and potential confounders                                                                                                                                                                  | 8  | The majority were female (62.2%), and 43.3% of the study population were elderly (age ≥60 years). About half of the subjects (54.1%) had two or more diagnosed co-existing chronic health conditions.                                                                                                                                                                                                                                                                                                                                                                 |

|                        |     |                                                                                                                                                                                                              |    |                                                                                    |
|------------------------|-----|--------------------------------------------------------------------------------------------------------------------------------------------------------------------------------------------------------------|----|------------------------------------------------------------------------------------|
|                        |     | (b) Indicate number of participants with missing data for each variable of interest                                                                                                                          | 11 | We did not have missing data in our analysis.                                      |
|                        |     | (c) <i>Cohort study</i> —Summarise follow-up time (eg, average and total amount)                                                                                                                             |    |                                                                                    |
| Outcome data           | 15* | <i>Cohort study</i> —Report numbers of outcome events or summary measures over time                                                                                                                          |    |                                                                                    |
|                        |     | <i>Case-control study</i> —Report numbers in each exposure category, or summary measures of exposure                                                                                                         |    |                                                                                    |
|                        |     | <i>Cross-sectional study</i> —Report numbers of outcome events or summary measures                                                                                                                           | 8  | 77.9 % of adults with diabetes were using five or more medication classes.         |
| Main results           | 16  | (a) Give unadjusted estimates and, if applicable, confounder-adjusted estimates and their precision (eg, 95% confidence interval). Make clear which confounders were adjusted for and why they were included | 9  | Confounder-adjusted estimates were age, gender and co-existing chronic conditions. |
|                        |     | (b) Report category boundaries when continuous variables were categorized                                                                                                                                    |    | For the age group, we used 10 years category boundry                               |
|                        |     | (c) If relevant, consider translating estimates of relative risk into absolute risk for a meaningful time period                                                                                             |    | Not Applicable                                                                     |
| Continued on next page |     |                                                                                                                                                                                                              |    |                                                                                    |

1  
2  
3  
4  
5  
6  
7  
8  
9  
10  
11  
12  
13  
14  
15  
16  
17  
18  
19  
20  
21  
22  
23  
24  
25  
26  
27  
28  
29  
30  
31  
32  
33  
34  
35  
36  
37  
38  
39  
40  
41  
42  
43  
44  
45  
46  
47

|                   |    |                                                                                                                                                                            |    |                                                                                                                                                                                                                                                                                                                                                                                                                                                                                                                                                                                                                                                                                                                                                                                                                                                                                                                                                                                                                                                                                                          |
|-------------------|----|----------------------------------------------------------------------------------------------------------------------------------------------------------------------------|----|----------------------------------------------------------------------------------------------------------------------------------------------------------------------------------------------------------------------------------------------------------------------------------------------------------------------------------------------------------------------------------------------------------------------------------------------------------------------------------------------------------------------------------------------------------------------------------------------------------------------------------------------------------------------------------------------------------------------------------------------------------------------------------------------------------------------------------------------------------------------------------------------------------------------------------------------------------------------------------------------------------------------------------------------------------------------------------------------------------|
| Other analyses    | 17 | Report other analyses done—eg analyses of subgroups and interactions, and sensitivity analyses                                                                             | 11 | Not Applicable                                                                                                                                                                                                                                                                                                                                                                                                                                                                                                                                                                                                                                                                                                                                                                                                                                                                                                                                                                                                                                                                                           |
| <b>Discussion</b> |    |                                                                                                                                                                            |    |                                                                                                                                                                                                                                                                                                                                                                                                                                                                                                                                                                                                                                                                                                                                                                                                                                                                                                                                                                                                                                                                                                          |
| Key results       | 18 | Summarise key results with reference to study objectives                                                                                                                   | 9  | Our study estimated the prevalence of polypharmacy among adults with diabetes in Saudi Arabia. In our study population, the rate of polypharmacy was high; nearly eighty percent of adults with diabetes used five or more medication classes. While this rate is within the documented rate in the literature among adults with diabetes 57% to 84%, we could not find a study that reported the rate of polypharmacy among all age groups of adults with diabetes. We observed a higher rate of polypharmacy among the elderly as compared to all age groups.                                                                                                                                                                                                                                                                                                                                                                                                                                                                                                                                          |
| Limitations       | 19 | Discuss limitations of the study, taking into account sources of potential bias or imprecision. Discuss both direction and magnitude of any potential bias                 | 11 | This study has some limitations; we used a 12-month period to measure multiple medications use, which is not concurrent use and may have resulted in a very high rate of multiple medications uses. We did not control for the severity of diabetes using the Diabetes Complications Severity Index (DCSI) which may affect the rate of polypharmacy. We have also only observed filled prescriptions and not actual use of the medications. By using the EHR data; so we cannot eliminate some risk of bias; inaccurate information, or missing data related to the use of EHR. Due to the cross-sectional nature of the data; it is difficult to assess the causal relationship. People with the end of life care were included and this may have overestimated the rate of polypharmacy. Moreover, we have included all medication classes, including the topical agents, and vitamins in our definition, which may have overestimated the rate of polypharmacy. It has to be noticed that not all polypharmacy is harmful; however, we have not assessed if the polypharmacy was appropriate or not. |
| Interpretation    | 20 | Give a cautious overall interpretation of results considering objectives, limitations, multiplicity of analyses, results from similar studies, and other relevant evidence | 9  | The very high rate of polypharmacy observed in our study population suggests that health care providers need to routinely monitor these individuals for potentially inappropriate medications, adverse drug events, and drug-drug interactions. Diabetes patients with polypharmacy may benefit from                                                                                                                                                                                                                                                                                                                                                                                                                                                                                                                                                                                                                                                                                                                                                                                                     |

1  
2  
3  
4  
5  
6  
7  
8  
9  
10  
11  
12  
13  
14  
15  
16  
17  
18  
19  
20  
21  
22  
23  
24  
25  
26  
27  
28  
29  
30  
31  
32  
33  
34  
35  
36  
37  
38  
39  
40  
41  
42  
43  
44  
45  
46  
47

---

multidisciplinary collaborative care model that involves pharmacist follow up for the patients to assess the medication use.

---

Generalisability 21 Discuss the generalisability (external validity) of the study results

This study was conducted in a tertiary hospital in Riyadh; therefore the findings from this study cannot be generalized to primary care settings or to other regions in Saudi Arabia.

---

**Other information**

Funding 22 Give the source of funding and the role of the funders for the present study and, if applicable, for the original study on which the present article is based

Not Applicable

---

\*Give information separately for cases and controls in case-control studies and, if applicable, for exposed and unexposed groups in cohort and cross-sectional studies.

**Note:** An Explanation and Elaboration article discusses each checklist item and gives methodological background and published examples of transparent reporting. The STROBE checklist is best used in conjunction with this article (freely available on the Web sites of PLoS Medicine at <http://www.plosmedicine.org/>, Annals of Internal Medicine at <http://www.annals.org/>, and Epidemiology at <http://www.epidem.com/>). Information on the STROBE Initiative is available at [www.strobe-statement.org](http://www.strobe-statement.org).

# BMJ Open

## Polypharmacy among Patients with Diabetes: A Cross-Sectional Retrospective Study in a Tertiary Hospital in Saudi Arabia

|                                 |                                                                                                                                                                                                                                                                                                                                                                                                                                                                                                                                                                                                                                                                                                                                                                                                                                                           |
|---------------------------------|-----------------------------------------------------------------------------------------------------------------------------------------------------------------------------------------------------------------------------------------------------------------------------------------------------------------------------------------------------------------------------------------------------------------------------------------------------------------------------------------------------------------------------------------------------------------------------------------------------------------------------------------------------------------------------------------------------------------------------------------------------------------------------------------------------------------------------------------------------------|
| Journal:                        | <i>BMJ Open</i>                                                                                                                                                                                                                                                                                                                                                                                                                                                                                                                                                                                                                                                                                                                                                                                                                                           |
| Manuscript ID                   | bmjopen-2017-020852.R2                                                                                                                                                                                                                                                                                                                                                                                                                                                                                                                                                                                                                                                                                                                                                                                                                                    |
| Article Type:                   | Research                                                                                                                                                                                                                                                                                                                                                                                                                                                                                                                                                                                                                                                                                                                                                                                                                                                  |
| Date Submitted by the Author:   | 06-Apr-2018                                                                                                                                                                                                                                                                                                                                                                                                                                                                                                                                                                                                                                                                                                                                                                                                                                               |
| Complete List of Authors:       | Alwhaibi, Monira; King Saud University College of Pharmacy, Clinical Pharmacy; King Saud University, Medication Safety Research Chair Balkhi, Bander; King Saud University College of Pharmacy, Clinical Pharmacy; King Saud University, Medication Safety Research Chair Alhawassi, Tariq ; King Saud University College of Pharmacy, Clinical Pharmacy; King Saud University, Medication Safety Research Chair Alkofide, Hadeel; King Saud University College of Pharmacy, Clinical Pharmacy<br>Alduhaim, Nouf; King Saud University College of Pharmacy, Clinical Pharmacy<br>Alabdulaali, Rawan; King Saud University College of Pharmacy, Clinical Pharmacy<br>drweesh, hadeel ; King Saud University College of Pharmacy, Clinical Pharmacy<br>Sambamoorthi, Usha; West Virginia University Health Sciences Center, Pharmaceutical Systems & Policy |
| <b>Primary Subject Heading</b>: | Pharmacology and therapeutics                                                                                                                                                                                                                                                                                                                                                                                                                                                                                                                                                                                                                                                                                                                                                                                                                             |
| Secondary Subject Heading:      | Diabetes and endocrinology, Epidemiology, Health services research, Pharmacology and therapeutics                                                                                                                                                                                                                                                                                                                                                                                                                                                                                                                                                                                                                                                                                                                                                         |
| Keywords:                       | DIABETES & ENDOCRINOLOGY, Health & safety < HEALTH SERVICES ADMINISTRATION & MANAGEMENT, EPIDEMIOLOGY, Drug Use Evaluation                                                                                                                                                                                                                                                                                                                                                                                                                                                                                                                                                                                                                                                                                                                                |
|                                 |                                                                                                                                                                                                                                                                                                                                                                                                                                                                                                                                                                                                                                                                                                                                                                                                                                                           |

SCHOLARONE™  
Manuscripts

1  
2  
3 **Polypharmacy among Patients with Diabetes: A Cross-Sectional Retrospective Study in a**  
4 **Tertiary Hospital in Saudi Arabia**  
5

6 *Monira Alwhaibi, Ph.D<sup>1,2\*</sup>, Bander Balkhi, Pharm.D, Ph.D<sup>1,2</sup>, Tariq M. Alhawassi, Ph.D<sup>1,2,3</sup>,*  
7 *Hadeel Alkofide, PhD<sup>1</sup>, Nouf Alduhaim<sup>1</sup>, Rawan Alabdulali<sup>1</sup>, Hadeel Drweesh<sup>1</sup>, Usha*  
8 *Sambamoorthi, Ph.D<sup>4</sup>*  
9

10  
11  
12 <sup>1</sup> Department of Clinical Pharmacy, College of Pharmacy, King Saud University, Riyadh, Saudi  
13 Arabia

14 <sup>2</sup> Medication Safety Research Chair, College of Pharmacy, King Saud University, Riyadh, Saudi  
15 Arabia

16 <sup>3</sup> Pharmacy Services, King Saud University Medical City, Riyadh, Saudi Arabia

17 <sup>4</sup> Department of Pharmaceutical Systems and Policy, School of Pharmacy, West Virginia  
18 University, Morgantown, West Virginia  
19  
20

21  
22  
23  
24  
25  
26  
27  
28  
29  
30  
31  
32  
33  
34  
35 \*Corresponding author: Monira Alwhaibi, MS, PhD, Assistant Professor, Department of Clinical  
36 Pharmacy, King Saud University, College of Pharmacy, Riyadh, 11149, Phone: +966535384152,  
37 E-mail: malwhaibi@ksu.edu.sa  
38  
39  
40  
41  
42  
43  
44  
45  
46  
47  
48  
49  
50  
51  
52  
53  
54  
55  
56  
57  
58  
59  
60



## ABSTRACT

**Objectives.** Patients with diabetes are at high risk for polypharmacy (i.e. use of multiple medications) for treatment of diabetes, associated comorbidities, and other co-existing conditions. This study aims to estimate the prevalence of polypharmacy and factors associated with polypharmacy among adult patients with diabetes.

**Methods.** A cross-sectional retrospective observational study of adults with diabetes, who visited the outpatient clinic of a tertiary teaching hospital in Saudi Arabia, was conducted. Data were extracted from the Electronic Health Record (EHR) database for a period of twelve-month (January to December 2016). Polypharmacy was defined as the cumulative use of five or more medications. Polypharmacy among adults with diabetes was measured by calculating the average number of medications prescribed per patient. A multivariable logistic regression model was used to examine the factors associated with polypharmacy.

**Results.** A total of 8,932 adults with diabetes were included in this study. Of these, nearly 78 % had polypharmacy, which was more likely among women as compared to men and more likely among older adults (age  $\geq 60$  years) as compared to the adults. Also, polypharmacy was two times as likely among patients with coexisting cardiovascular conditions (AOR=2.89; 95% CI: 2.54-3.29), respiratory disease (AOR=2.42; 95% CI: 1.92-3.03), and mental health conditions (AOR=2.19; 95% CI: 1.74-2.76), and three times as likely among patients with co-existing musculoskeletal disease (AOR=3.16; 95% CI: 2.31-4.30) as compared to those without these co-existing chronic conditions categories.

**Conclusions.** Polypharmacy is common among patients with diabetes, with an even higher rate in older adults patients. Health care providers can help in detecting polypharmacy and in providing recommendations for simplifying medication regimens and minimizing medications to enhance the outcome of diabetes care.

**Keywords.** Diabetes; Polypharmacy; Chronic conditions; Electronic health records; Drug use evaluation.

### Strengths and limitations of this study

- This study has provided a real insight into the current prevalence and predictors of polypharmacy among patients with diabetes in Saudi Arabia including a large study population of patients with diabetes.
- Around nine-thousand patients were included in this study, which allowed us to identify the prevalence of polypharmacy among a subgroup of patients.
- This study has not controlled for the severity of diabetes using the Diabetes Complications Severity Index (DCSI) which may affect the rate of polypharmacy.
- This study used a twelve-month period to measure multiple medications use, which is not concurrent use and may have resulted in a very high rate of multiple medications uses.
- It has to be noticed that not all polypharmacy is harmful; however, future studies to assess inappropriate medications associated with polypharmacy is warranted

## INTRODUCTION

Diabetes is a highly prevalent chronic condition among adults in Saudi Arabia; between 21-24% of adults are estimated to have diabetes.<sup>1,2</sup> It is projected that 27% of adults in Saudi Arabia will have diabetes by 2035.<sup>3</sup> Diabetes is one of the top ten causes of morbidity and mortality worldwide.<sup>4</sup> Patients with diabetes often have co-existing chronic health conditions such as hypertension, dyslipidemia, coronary artery disease, depression and chronic kidney disease, which requires the use of multiple medications to treat those co-existing chronic conditions.<sup>5</sup> All of this put patients with diabetes at high risk of polypharmacy,<sup>6,7</sup> with an estimated prevalence of 57% to 84% of patients with diabetes using five or more medications.<sup>8</sup> A study among adults with diabetes in the US documented that the 54% of adults with diabetes have polypharmacy.<sup>9</sup> A multicenter cross-sectional survey conducted in Italy reported that 57% of patients with diabetes use five or more medications.<sup>10</sup> In addition, polypharmacy was reported among 84% older adults patients with diabetes.<sup>8</sup> In Saudi Arabia, a cross-sectional study among 766 adults who visited outpatient's clinic at a tertiary care center, reported that the prevalence of polypharmacy among patients with diabetes was 71%.<sup>11</sup>

An examination of polypharmacy among patients with diabetes is important because polypharmacy increases the probability of the adverse drug events<sup>12,13</sup>, drug-drug interactions<sup>14</sup>, duplication of therapy,<sup>15</sup> decreases compliance to antidiabetic medications,<sup>16</sup> and leads to suboptimal glycemic control.<sup>17</sup> The presence of polypharmacy is also associated with prescribing cascade, in which adverse drug events are misinterpreted as new medical conditions which can result in the prescription of new medications to treat those conditions.<sup>18</sup> Polypharmacy has other negative health consequences such as increased risk of

1  
2  
3 hospitalization and medication error,<sup>19,20</sup> higher risk of fall,<sup>21</sup> poor functional status,<sup>22</sup> poor  
4 quality of life, and high healthcare cost.<sup>23,24</sup> Polypharmacy among diabetes patients is often  
5 associated with many factors. These include age,<sup>11</sup> sex,<sup>10</sup> co-existing conditions,<sup>10</sup> rurality,  
6  
7  
8  
9  
10  
11  
12  
13  
14  
15  
16  
17  
18  
19  
20  
21  
22  
23  
24  
25  
26  
27  
28  
29  
30  
31  
32  
33  
34  
35  
36  
37  
38  
39  
40  
41  
42  
43  
44  
45  
46  
47  
48  
49  
50  
51  
52  
53  
54  
55  
56  
57  
58  
59  
60

25,11 diabetes complications<sup>10</sup>, and aggressive diabetes treatment.<sup>26,27</sup>

To date, limited studies have examined the prevalence of polypharmacy among adults with diabetes living in Saudi Arabia on a large scale, and assessed the specific factors that put patients at risk of polypharmacy. Identifying the prevalence and the subgroup of patients at high risk of polypharmacy will facilitate pharmacovigilance efforts in clinical practice settings. Therefore, the primary objective of this observational study is to examine the prevalence of polypharmacy among adults with diabetes in Saudi Arabia and to identify the factors that are associated with polypharmacy, specifically the association between co-existing chronic conditions and polypharmacy.

## METHODS

### Study Design

A cross-sectional retrospective observational study was conducted in a tertiary teaching hospital in Saudi Arabia. This hospital is one of the largest tertiary teaching hospitals in Riyadh, Saudi Arabia, with a 1200-bed facility and all general and subspecialty medical services. The hospital provides primary, secondary, and tertiary care services. The patient population is composed predominantly of local citizens as well as residents, from northern region in Riyadh; the hospital also serves the entire country as a referral center.

## Data Source and Data Extraction

This study used data retrieved from the Electronic Health Record (EHR) database for the period from 1<sup>st</sup> January 2016, until 30<sup>th</sup> December 2016. Institutional review board (IRB) at King Saud University Medical City approval was obtained to conduct the study (IRB number: E-17-2601). Strict confidentiality of the data was maintained throughout the research process. The data from EHR were derived from demographics file, clinical diagnosis file, and prescription drug file. The demographics file contained information about the patients' date of birth, gender, marital status, nationality, and encounter type. The clinical diagnosis file provided information about the clinical diagnosis from inpatient and outpatient visits. Physicians reported clinical diagnosis using the *International Classifications of Diseases – 9<sup>th</sup> edition, Clinical Modification* (ICD-9-CM) codes, *International Classifications of Diseases – 10<sup>th</sup> edition, Clinical Modification* (ICD-10-CM) codes, or the *Systematized Nomenclature of Medicine* (SNOMED) diagnosis codes. The prescription drug file contained information about the medications used. The demographics, clinical diagnosis, and prescription drug files were merged into one file using the encrypted patient medical record number. The completeness and the validity of the data from EHR in this tertiary teaching hospital in Saudi Arabia has not been studied before; however the researchers of this study examined the completeness of this data and found that 91.0% of the patients had a complete data (i.e., have information on the age, gender, marital status, nationality, encounter type, and clinical diagnosis) and 85.0% of the patients had complete medication-related information.

## Study Population

The study population comprised of all adult patients with diabetes (Type I and Type II) (age  $\geq 18$ -year) (n = 8,932) who received their treatment at the outpatient's setting in the tertiary

1  
2  
3 teaching hospital during a one-year period. No exclusion criteria were applied to the study  
4  
5 population.  
6  
7  
8  
9

## 10 **Patient and Public Involvement**

11  
12  
13 Patients and public were not involved in the design or conduct of this study.  
14  
15

## 16 **Measures**

### 17 *Dependent Variable*

18  
19  
20 In our study, the dependent variable was “polypharmacy”. There are different approaches  
21  
22 in the literature to measure polypharmacy such as simultaneous, cumulative and continuous.  
23  
24 Also, there is no consensus on the thresholds regarding the number of medications above which  
25  
26 we consider the existence of polypharmacy.<sup>28</sup> In the current study, we defined polypharmacy as  
27  
28 the cumulative use of five or more medications during a one year period, this threshold has been  
29  
30 used more than others.<sup>25,28,29</sup> Using this definition, the prevalence of polypharmacy among adults  
31  
32 was measured by the sum of unique therapeutic medication classes administered over a twelve-  
33  
34 month period. There is no consensus on the medications that should be included in the  
35  
36 measurements of the polypharmacy. Also, all the prescription and the non-prescription/Over the  
37  
38 Counter (OTC) medications categories were included in our definition of polypharmacy.  
39  
40  
41  
42  
43  
44

### 45 *Independent Variables*

46  
47 Independent variables included were age groups in years (18-29, 30-39, 40-49, 50-59, 60-  
48  
49 69, 70-79,  $\geq 80$ ), gender, nationality (Saudi, non-Saudi), marital status (married, unmarried), and  
50  
51 documented chronic conditions which were classified into five categories (cardiovascular,  
52  
53 chronic kidney disease, musculoskeletal, respiratory, or mental health conditions) (Appendix I).  
54  
55  
56  
57  
58  
59  
60

1  
2  
3 Cardiovascular conditions composed of hypertension, ischemic heart disease, vascular heart  
4 disease, stroke, heart failure, and dyslipidemia. Musculoskeletal conditions composed of  
5 osteoarthritis, and osteoporosis; respiratory conditions include asthma, and chronic obstructive  
6 pulmonary disease (COPD). Mental health conditions include dementia, depression, anxiety, and  
7 schizophrenia. These conditions have been selected because they are highly prevalent among  
8 patients with diabetes and some of them were associated with polypharmacy.<sup>5,30</sup>

### 19 **Statistical Analysis**

21 Frequency and percentage were used to describe the categorical variables (age, sex,  
22 marital status, nationality, co-existing chronic conditions, and polypharmacy). Mean and  
23 Standard deviation were used to describe continuous variables. Chi-square tests were used to  
24 examine the factors associated with polypharmacy. A multivariable logistic regression was used  
25 to examine the factors associated with polypharmacy (i.e., use of  $\geq 5$  medications) after adjusting  
26 for age, sex, marital status, nationality, and co-existing chronic conditions. All statistical  
27 analyses were carried out using the Statistical analysis software, version 9.2 (SAS® 9.2).

### 37 **RESULTS**

39 A total of 8,932 adult patients were identified during the twelve-month period. The  
40 majority were Saudi (89.4%), female (62.2%), and 43.3% of the study population were older  
41 adults (age  $\geq 60$  years), the mean age of the study population was 57 years old. About half of the  
42 subjects (54.1%) had two or more diagnosed co-existing chronic health conditions.

43 Hypertension, dyslipidemia, asthma, osteoarthritis, and anxiety were among the most common  
44 chronic conditions in our study population. Characteristics of the study population are presented  
45 in Table 1.

### *Polypharmacy among Patients with Diabetes*

Overall 77.9 % of adults with diabetes have used (cumulative) five or more medications. Also, when we identified the rate of hyperpolypharmacy (i.e, taking 10 or more medications) we found that 17.2% of adults have a hyperpolypharmacy. The most commonly used medications in our study population were antidiabetic medications (81.4%), followed by nonsteroidal anti-inflammatory drugs (72.4%) and antihyperlipidemic agents (68.8%) (Table 2).

The study population characteristics by polypharmacy status are summarized in Table 1. This study found a significantly higher percentage of polypharmacy among older adults as compared to patients with age between 18-29 (84.8% vs 37.4%, P-value <0.001). Women with diabetes had a significantly higher percentage of polypharmacy as compared to men (81.7% vs. 71.6%, P-value <0.001). Moreover, polypharmacy was significantly higher among diabetes patients with two or more co-existing comorbid conditions versus those with no co-existing chronic conditions (89.6% vs. 48.6%, P-value <0.001). Looking at comorbid conditions closely, polypharmacy was significantly higher among patients with cardiovascular (83.4%, P-value <0.001), chronic kidney disease (95.2%, P-value <0.001), musculoskeletal (93.6%, P-value <0.001), respiratory (89.0%, P-value <0.001), and mental health conditions (85.4%, P-value <0.001) as compared to those without those co-existing chronic conditions.

### *Logistic Regression: Factors Associated with Polypharmacy*

The adjusted odds ratios (AOR) and 95% confidence intervals (CI) from multivariable logistic regression on polypharmacy are displayed in Table 3. Several factors were identified: age, gender, and co-existing chronic conditions. Polypharmacy was more likely among older adults as compared to younger adults. Women were more likely to have polypharmacy compared to men (AOR=1.60; 95% CI: 1.43-1.79). Cardiovascular diseases, mental conditions, respiratory



1  
2  
3 and musculoskeletal diseases were all significantly associated with polypharmacy. For example,  
4 adults with diabetes and musculoskeletal disease were three times more likely to have  
5 polypharmacy (AOR=3.16; 95% CI: 2.31-4.30) as compared to adults with diabetes and without  
6 musculoskeletal conditions.  
7  
8  
9  
10  
11  
12  
13

## 14 **DISCUSSION**

15  
16  
17 Our study was set out to examine the prevalence of polypharmacy among adults with  
18 diabetes in Saudi Arabia. In this large sample of subjects with diabetes, the rate of polypharmacy  
19 was high, as nearly four out of five adults with diabetes were prescribed five or more  
20 medications. Similar rates were reported in the literature among patients with diabetes 54-84%,<sup>8-</sup>  
21  
22  
23  
24  
25  
26  
27  
28  
29  
30  
31  
32  
33  
34  
35  
36  
37  
38  
39  
40  
41  
42  
43  
44  
45  
46  
47  
48  
49  
50  
51  
52  
53  
54  
55  
56  
57  
58  
59  
60  
10  
however, to our knowledge, no study has attempted to measure the rate of polypharmacy  
among all age groups of adults with diabetes, which is a major contribution of our study. A  
higher rate of polypharmacy among older individuals (age 60 and above) as compared to all age  
groups was also observed in this study. Studies among adults in the general population have  
reported that older adults (defined as age  $\geq 60$  or age  $\geq 65$  years) have a higher risk of  
polypharmacy use as compared to adults.<sup>31,32</sup> One possible reason for the high rate of  
polypharmacy among this population is the coexistence of other chronic conditions.

Furthermore, a noteworthy finding of the current study is the high prevalence of chronic  
conditions and the higher rate of polypharmacy among diabetic individuals with co-existing  
chronic conditions. Previous studies have shown that 90% of patients with diabetes had at least  
one co-existing chronic condition,<sup>5</sup> our study found that 86% of patients with diabetes had at  
least one co-existing chronic condition. It is plausible that the high rate of polypharmacy in this  
study is potentially associated with the number of comorbidities among the study population.

1  
2  
3 The finding of this study support that diabetic patients with multiple chronic conditions were at  
4 higher risk of polypharmacy.<sup>5,33</sup> Although there is a well-documented literature on the  
5 relationship between the higher number of coexisting conditions and polypharmacy,<sup>5,10,34</sup> our  
6 study extended the literature by analyzing the association between the type of chronic conditions  
7 and polypharmacy. We observed that the polypharmacy rates differed by the type of co-existing  
8 chronic conditions; with the highest use among those with musculoskeletal conditions. This is  
9 not surprising because individuals with musculoskeletal conditions such as osteoarthritis use  
10 analgesic and non-steroidal anti-inflammatory drugs (NSAIDs) to relieve the chronic pain. We  
11 also observed that patients with cluster of diseases (diabetes and cardiovascular diseases) have a  
12 higher rate of polypharmacy as compared to adults without the cluster of diseases which is  
13 consistent with the published literature.<sup>31,35</sup> Patients with diabetes and mental health conditions  
14 have also a high rate of polypharmacy as compared to those without mental health conditions.  
15 Further studies are required to explore the contributing factors, as there is no supporting evidence  
16 in the literature. Polypharmacy was also highly prevalent among diabetic patients with  
17 respiratory diseases, which is consistent with data from previous studies, which showed higher  
18 rates of medication use in patients with COPD.<sup>36</sup>

19 Accordingly, health care providers need to routinely monitor these individuals for  
20 potentially inappropriate medications, adverse drug events, and drug-drug interactions. For  
21 instance, in older individuals, comprehensive geriatric assessment has shown effective impact in  
22 decreasing the number of medications prescribed.<sup>37</sup> Further, patients with diabetes and  
23 polypharmacy may benefit from multidisciplinary collaborative care model that involves  
24 pharmacist follow up for the patients to assess the medication use and minimize polypharmacy.  
25 In an open-label, parallel-arm, randomized, controlled study, collaborative care has been

1  
2  
3 associated with improvement in the management of diabetes and reduction the healthcare cost.<sup>38</sup>  
4  
5 Pharmacists can help other healthcare providers in detecting polypharmacy, drug interactions,  
6  
7 and in providing recommendations for simplified medication regimens and minimizing  
8  
9 medications to positively impact health outcomes of diabetes care.<sup>39,40</sup>  
10  
11

12 We also looked at other related factors for polypharmacy. We observed that women were  
13  
14 more likely to have a polypharmacy compared to men, this is consistent with the findings from  
15  
16 data among patients with diabetes.<sup>10</sup> In addition, studies have reported that women in the general  
17  
18 population have a higher use of prescribed and non-prescribed medications, and higher  
19  
20 healthcare utilization as compared to men.<sup>41-44</sup> This could be because women tend to be more  
21  
22 concerned about their health and seek health services more often than men.<sup>45</sup> It has to be noted  
23  
24 that the majority of patients with diabetes in our study were women, this is not surprising since  
25  
26 the rate of diabetes is higher in women as compared to men in Saudi Arabia.<sup>2</sup>  
27  
28  
29

### 30 **Strengths and limitations**

31  
32  
33 “This study has some limitations; we defined polypharmacy as the cumulative use of five  
34  
35 or more medications during a one year period rather than the concurrent use of medications,  
36  
37 using this definition may have overestimated the rate of polypharmacy”. We did not control for  
38  
39 the severity of diabetes using the Diabetes Complications Severity Index (DCSI), which may  
40  
41 affect the rate of polypharmacy. We have also only observed filled prescriptions and not actual  
42  
43 use of the medications. By using the EHR data, we cannot eliminate some risk of bias; inaccurate  
44  
45 information, or missing data related to the use of EHR. Due to the cross-sectional nature of the  
46  
47 data, it is difficult to assess any causal relationships. People with the end of life care were  
48  
49 included in the study, which may have also overestimated the rate of polypharmacy.<sup>46</sup> Moreover,  
50  
51 we have included all therapeutic medication classes, including over the counter medications and  
52  
53  
54  
55  
56  
57  
58  
59  
60

1  
2  
3 vitamins in our definition, which may have overestimated the rate of polypharmacy. It has to be  
4 noticed that not all polypharmacy is harmful; however, we have not assessed if the  
5 polypharmacy was appropriate or not. This study was conducted in a tertiary hospital in Riyadh;  
6 therefore, the findings from this study cannot be generalized to primary care settings or to other  
7 regions in Saudi Arabia. In addition, we cannot exclude selection-bias; patients included in this  
8 study may be sicker, have sever diabetes, and higher rates of comorbidities as compared to  
9 individuals seen in primary care settings.  
10  
11  
12  
13  
14  
15  
16  
17  
18  
19

20 Despite these limitations, this study has many advantages such as the use of large sample  
21 size, which allowed us to identify the prevalence of polypharmacy among a subgroup of patients.  
22 Furthermore, findings from this study added to the existing literature on the prevalence of  
23 polypharmacy among all age groups and identified the individuals who have a high risk of  
24 polypharmacy based on their comorbidities. In addition, our results highlighted the need for  
25 routine monitoring of high-risk individuals for drug-related problems. Therefore, future studies  
26 are required to identify the rate of polypharmacy among other healthcare settings and assess the  
27 impact of pharmacist-led interventions on the rate of polypharmacy in patients with diabetes.  
28  
29  
30  
31  
32  
33  
34  
35  
36  
37  
38

## 39 **CONCLUSION**

40  
41  
42 Polypharmacy is very common among adults with diabetes; particularly among  
43 individuals with multiple chronic conditions. Older adults patients have a higher rate of  
44 polypharmacy, which could be due to the increased number of multiple chronic conditions in this  
45 population. Moreover, patients with co-existing cardiovascular, mental and musculoskeletal  
46 chronic conditions are at a high risk of polypharmacy. Individuals with diabetes may benefit  
47 from simplified treatment regimens; thereby enhancing the health outcomes of this population.  
48  
49  
50  
51  
52  
53  
54  
55  
56  
57  
58  
59  
60

### **Ethics and Data Confidentiality**

Confidentiality of the data was maintained throughout the research process. Retrieved data was stored and saved as coded excel files. A customized formula was used to generate study-encrypted identification assigned to each participant and replaced patients' medical record number. Data extracted were stored at the Research Unit at the tertiary hospital on secured, password protected, and limited accessed computers.

### **Authors' contribution**

Dr.Monira Alwhaibi, Dr.Bander Balkhi, Dr.Tariq Alhawassi, Dr.Hadeel Alkofide, Nouf Alduhaim, Rawan Alabdulali, Hadeel Drweesh and Prof.Usha Sambamoorthi have all participated in designing the study, drafting the manuscript, analysis, interpretation of the findings, revising the manuscript content and gave final approval of the final version of this manuscript.

### **Acknowledgement**

The project was fully supported financially by the Vice Deanship of Research Chairs, King Saud University Riyadh, Saudi Arabia.

### **Data sharing statement**

No additional data are available.

### **Conflict of Interests**

The authors declare that there is no conflict of interests regarding the publication of this paper.

## REFERENCES

1. Al-Nozha MM, Al-Maatouq MA, Al-Mazrou YY, et al. Diabetes mellitus in Saudi Arabia. *Saudi medical journal*. 2004;25(11):1603-1610.
2. Alqurashi KA, Aljabri KS, Bokhari SA. Prevalence of diabetes mellitus in a Saudi community. *Annals of Saudi medicine*. 2011;31(1):19.
3. Guariguata L, Whiting D, Hambleton I, Beagley J, Linnenkamp U, Shaw J. Global estimates of diabetes prevalence for 2013 and projections for 2035. *Diabetes research and clinical practice*. 2014;103(2):137-149.
4. Lozano R, Naghavi M, Foreman K, et al. Global and regional mortality from 235 causes of death for 20 age groups in 1990 and 2010: a systematic analysis for the Global Burden of Disease Study 2010. *The Lancet*. 2013;380(9859):2095-2128.
5. Teljeur C, Smith SM, Paul G, Kelly A, O'Dowd T. Multimorbidity in a cohort of patients with type 2 diabetes. *The European journal of general practice*. 2013;19(1):17-22.
6. Good CB. Polypharmacy in elderly patients with diabetes. *Diabetes Spectrum*. 2002;15(4):240-248.
7. Austin RP. Polypharmacy as a risk factor in the treatment of type 2 diabetes. *Diabetes Spectrum*. 2006;19(1):13-16.
8. Gadsby R, Galloway M, Barker P, Sinclair A. Prescribed medicines for elderly frail people with diabetes resident in nursing homes—issues of polypharmacy and medication costs. *Diabetic Medicine*. 2012;29(1):136-139.
9. Grant RW, Devita NG, Singer DE, Meigs JB. Polypharmacy and medication adherence in patients with type 2 diabetes. *Diabetes care*. 2003;26(5):1408-1412.
10. Noale M, Veronese N, Perin PC, et al. Polypharmacy in elderly patients with type 2 diabetes receiving oral antidiabetic treatment. *Acta diabetologica*. 2016;53(2):323-330.
11. Salih SB, Yousuf M, Durihim H, Almodaimagh H, Tamim H. Prevalence and associated factors of polypharmacy among adult Saudi medical outpatients at a tertiary care center. *Journal of family & community medicine*. 2013;20(3):162.
12. Nguyen JK, Fouts MM, Kotabe SE, Lo E. Polypharmacy as a risk factor for adverse drug reactions in geriatric nursing home residents. *The American journal of geriatric pharmacotherapy*. 2006;4(1):36-41.
13. Viktil KK, Blix HS, Moger TA, Reikvam A. Polypharmacy as commonly defined is an indicator of limited value in the assessment of drug-related problems. *British journal of clinical pharmacology*. 2007;63(2):187-195.
14. Rodrigues MCS, Oliveira Cd. Drug-drug interactions and adverse drug reactions in polypharmacy among older adults: an integrative review. *Revista latino-americana de enfermagem*. 2016;24.
15. Golchin N, Frank SH, Vince A, Isham L, Meropol SB. Polypharmacy in the elderly. *Journal of research in pharmacy practice*. 2015;4(2):85.
16. Bailey C, Kodack M. Patient adherence to medication requirements for therapy of type 2 diabetes. *International journal of clinical practice*. 2011;65(3):314-322.
17. Willey CJ, Andrade SE, Cohen J, Fuller JC, Gurwitz JH. Polypharmacy with oral antidiabetic agents: an indicator of poor glycemic control. *American Journal of Managed Care*. 2006;12(8):435.
18. Peron EP, Ogbonna KC, Donohoe KL. Diabetic medications and polypharmacy. *Clinics in geriatric medicine*. 2015;31(1):17.

19. Breuker C, Abraham O, di Trapanie L, et al. Patients with diabetes are at high risk of serious medication errors at hospital: Interest of clinical pharmacist intervention to improve healthcare. *European journal of internal medicine*. 2017;38:38-45.
20. Rollason V, Vogt N. Reduction of polypharmacy in the elderly. *Drugs & aging*. 2003;20(11):817-832.
21. Huang ES, Karter AJ, Danielson KK, Warton EM, Ahmed AT. The association between the number of prescription medications and incident falls in a multi-ethnic population of adult type-2 diabetes patients: the diabetes and aging study. *Journal of general internal medicine*. 2010;25(2):141-146.
22. Shah BM, Hajjar ER. Polypharmacy, adverse drug reactions, and geriatric syndromes. *Clinics in geriatric medicine*. 2012;28(2):173-186.
23. Maher RL, Hanlon J, Hajjar ER. Clinical consequences of polypharmacy in elderly. *Expert opinion on drug safety*. 2014;13(1):57-65.
24. Santibanez-Beltran S, Villarreal-Rios E, Galicia-Rodriguez L, Martinez-Gonzalez L, Vargas-Daza E, Ramos-López J. Economic cost of polypharmacy in the elderly in primary health care. *Revista medica del Instituto Mexicano del Seguro Social*. 2012;51(2):192-199.
25. Slabaugh SL, Maio V, Templin M, Abouzaid S. Prevalence and Risk of Polypharmacy among the Elderly in an Outpatient Setting. *Drugs & aging*. 2010;27(12):1019-1028.
26. Wright E, Stonehouse A, Cuddihy R. In support of an early polypharmacy approach to the treatment of type 2 diabetes. *Diabetes, Obesity and Metabolism*. 2010;12(11):929-940.
27. Bauer S, Nauck M. Polypharmacy in people with Type 1 and Type 2 diabetes is justified by current guidelines—a comprehensive assessment of drug prescriptions in patients needing inpatient treatment for diabetes—associated problems. *Diabetic Medicine*. 2014;31(9):1078-1085.
28. Monégat M, Sermet C, Perronnin M, Rococo E. Polypharmacy: definitions, measurement and stakes involved: review of the literature and measurement tests. *Quest d'économie la santé*. 2014;204:1-8.
29. Grimmsmann T, Himmel W. Polypharmacy in primary care practices: an analysis using a large health insurance database. *Pharmacoepidemiology and drug safety*. 2009;18(12):1206-1213.
30. Iglay K, Hannachi H, Joseph Howie P, et al. Prevalence and co-prevalence of comorbidities among patients with type 2 diabetes mellitus. *Current medical research and opinion*. 2016;32(7):1243-1252.
31. Vyas A, Pan X, Sambamoorthi U. Chronic condition clusters and polypharmacy among adults. *International journal of family medicine*. 2012;2012.
32. Balkhi B, AlQahtani N, Alwhaibi M, et al. Prevalence and Factors Associated With Polypharmacy Use Among Adult Patients in Saudi Arabia. *Journal of patient safety*. 2017.
33. Lewis NJ, Bugdalski-Stutrud C, Abate MA, Blommel M, Wu C-H, Gaither CA. The Medication Assessment Program: comprehensive medication assessments for persons taking multiple medications for chronic diseases. *Journal of the American Pharmacists Association*. 2008;48(2):171-180.



- 1
  - 2
  - 3
  - 4
  - 5
  - 6
  - 7
  - 8
  - 9
  - 10
  - 11
  - 12
  - 13
  - 14
  - 15
  - 16
  - 17
  - 18
  - 19
  - 20
  - 21
  - 22
  - 23
  - 24
  - 25
  - 26
  - 27
  - 28
  - 29
  - 30
  - 31
  - 32
  - 33
  - 34
  - 35
  - 36
  - 37
  - 38
  - 39
  - 40
  - 41
  - 42
  - 43
  - 44
  - 45
  - 46
  - 47
  - 48
  - 49
  - 50
  - 51
  - 52
  - 53
  - 54
  - 55
  - 56
  - 57
  - 58
  - 59
  - 60
34. Feng X, Tan X, Riley B, Zheng T, Bias T, Sambamoorthi U. Polypharmacy and Multimorbidity Among Medicaid Enrollees: A Multistate Analysis. *Population Health Management*. 2017.
35. Nobili A, Marengoni A, Tettamanti M, et al. Association between clusters of diseases and polypharmacy in hospitalized elderly patients: results from the REPOSI study. *European journal of internal medicine*. 2011;22(6):597-602.
36. Franssen FM, Spruit MA, Wouters EF. Determinants of polypharmacy and compliance with GOLD guidelines in patients with chronic obstructive pulmonary disease. *International journal of chronic obstructive pulmonary disease*. 2011;6:493.
37. Sergi G, De Rui M, Sarti S, Manzato E. Polypharmacy in the elderly. *Drugs & aging*. 2011;28(7):509-518.
38. Siaw M. Collaborative care cost saving in Asian patients with T2DM. *Pharmacoeconomics & Outcomes News*. 2017;779:10-13.
39. Chumney EC, Robinson LC. The effects of pharmacist interventions on patients with polypharmacy. *Pharmacy Practice*. 2006;4(3):103.
40. Wang Y, Yeo Q, Ko Y. Economic evaluations of pharmacist-managed services in people with diabetes mellitus: a systematic review. *Diabetic Medicine*. 2016;33(4):421-427.
41. Qato DM, Alexander GC, Conti RM, Johnson M, Schumm P, Lindau ST. Use of prescription and over-the-counter medications and dietary supplements among older adults in the United States. *Jama*. 2008;300(24):2867-2878.
42. Bertakis KD, Azari R, Helms LJ, Callahan EJ, Robbins JA. Gender differences in the utilization of health care services. *Journal of family practice*. 2000;49(2):147-147.
43. Redondo-Sendino Á, Guallar-Castillón P, Banegas JR, Rodríguez-Artalejo F. Gender differences in the utilization of health-care services among the older adult population of Spain. *BMC public health*. 2006;6(1):155.
44. Loikas D, Wettermark B, von Euler M, Bergman U, Schenck-Gustafsson K. Differences in drug utilisation between men and women: a cross-sectional analysis of all dispensed drugs in Sweden. *BMJ open*. 2013;3(5):e002378.
45. Venturini CD, Engroff P, Ely LS, et al. Gender differences, polypharmacy, and potential pharmacological interactions in the elderly. *Clinics*. 2011;66(11):1867-1872.
46. Maddison AR, Fisher J, Johnston G. Preventive medication use among persons with limited life expectancy. *Progress in palliative care*. 2011;19(1):15-21.



**Table 1**  
**Characteristics of the Study Population**  
**Number and Row Percentage of Characteristics by Polypharmacy among Adults with Diabetes**  
**Electronic Health Records Database, 2016**

|                                   | Total       |       | Polypharmacy |      | No Polypharmacy |      | chisqval | Sig. |
|-----------------------------------|-------------|-------|--------------|------|-----------------|------|----------|------|
|                                   | N           | %     | N            | %    | N               | %    |          |      |
| <b>Total</b>                      | 8,932       | 100.0 | 6,957        | 77.9 | 1,975           | 22.1 |          |      |
| <b># of Medications Mean(SD)</b>  | 6.54 (3.50) |       | 8.06 (2.97)  |      | 2.85 (1.14)     |      |          |      |
| <b>Age Mean (SD)</b>              | 57.7(12.12) |       | 59.7 (11.3)  |      | 52.7(12.68)     |      |          |      |
| <b>Age Group</b>                  |             |       |              |      |                 |      | 517.7    | ***  |
| 18-29                             | 198         | 2.2   | 74           | 37.4 | 124             | 62.6 |          |      |
| 30-39                             | 463         | 5.2   | 253          | 54.6 | 210             | 45.4 |          |      |
| 40-49                             | 1,226       | 13.7  | 830          | 67.7 | 396             | 32.3 |          |      |
| 50-59                             | 3,176       | 35.6  | 2,521        | 79.4 | 655             | 20.6 |          |      |
| 60-69                             | 2,434       | 27.3  | 1,909        | 78.4 | 525             | 21.6 |          |      |
| 70-79                             | 1,126       | 12.6  | 951          | 84.5 | 175             | 15.5 |          |      |
| =>80                              | 309         | 3.5   | 269          | 87.1 | 40              | 12.9 |          |      |
| <b>Marital Status</b>             |             |       |              |      |                 |      | 76.5     | ***  |
| single                            | 957         | 11.6  | 635          | 66.4 | 322             | 33.6 |          |      |
| Married                           | 7,310       | 88.4  | 5,769        | 78.9 | 1,541           | 21.1 |          |      |
| <b>Gender</b>                     |             |       |              |      |                 |      | 122.8    | ***  |
| Male                              | 3,375       | 37.8  | 2,418        | 71.6 | 957             | 28.4 |          |      |
| Female                            | 5,557       | 62.2  | 4,539        | 81.7 | 1,018           | 18.3 |          |      |
| <b>Nationality</b>                |             |       |              |      |                 |      | 6.6      | **   |
| Saudi                             | 7,957       | 89.4  | 6,167        | 77.5 | 1,790           | 22.5 |          |      |
| Non-Saudi                         | 946         | 10.6  | 768          | 81.2 | 178             | 18.8 |          |      |
| <b>Chronic kidney disease</b>     |             |       |              |      |                 |      | 25.8     | ***  |
| Yes                               | 146         | 1.6   | 139          | 95.2 | 7               | 4.8  |          |      |
| No                                | 8,786       | 98.4  | 6,818        | 77.6 | 1,968           | 22.4 |          |      |
| <b>Cardiovascular Conditions</b>  |             |       |              |      |                 |      | 668.1    | ***  |
| Yes                               | 7,209       | 80.7  | 6,015        | 83.4 | 1,194           | 16.6 |          |      |
| No                                | 1,723       | 19.3  | 942          | 54.7 | 781             | 45.3 |          |      |
| <b>Musculoskeletal Conditions</b> |             |       |              |      |                 |      | 124.4    | ***  |
| Yes                               | 787         | 8.8   | 737          | 93.6 | 50              | 6.4  |          |      |
| No                                | 8,145       | 91.2  | 6,220        | 76.4 | 1,925           | 23.6 |          |      |
| <b>Respiratory Conditions</b>     |             |       |              |      |                 |      | 76.8     | ***  |
| Yes                               | 961         | 10.8  | 855          | 89.0 | 106             | 11.0 |          |      |
| No                                | 7,971       | 89.2  | 6,102        | 76.6 | 1,869           | 23.4 |          |      |
| <b>Mental Health Conditions</b>   |             |       |              |      |                 |      | 27.3     | ***  |
| Yes                               | 766         | 8.6   | 654          | 85.4 | 112             | 14.6 |          |      |
| No                                | 8,166       | 91.4  | 6,303        | 77.2 | 1,863           | 22.8 |          |      |
| <b># Chronic Conditions</b>       |             |       |              |      |                 |      | 1093.8   | ***  |
| No co-existing conditions         | 1250        | 14.0  | 607          | 48.6 | 643             | 51.4 |          |      |
| Single co-existing condition      | 2849        | 31.9  | 2,018        | 70.8 | 831             | 29.2 |          |      |
| ≥2 co-existing conditions         | 4833        | 54.1  | 4,332        | 89.6 | 501             | 10.4 |          |      |

Note: Study population comprised of 8,932 adults with diabetes (age >18year) who visited outpatient's clinics from a tertiary hospital in 2016. Polypharmacy was defined as the cumulative use of five or more medications during the one year period. Chisqval: Chi square value; Sig: significance; #: Number. Asterisks (\*) represent significant differences in polypharmacy from chi-square tests ; \*\*\*P< 0.001, \*\*

0.001 ≤ P < 0.01

**Table 2**  
**Most Prevalent Therapeutic Classes among the Study**  
**Population (n = 8,932)**

| <b>Medication Therapy Class</b>           | <b>N</b> | <b>%</b> |
|-------------------------------------------|----------|----------|
| Oral Antidiabetic Agent                   | 7,270    | 81.4     |
| Nonsteroidal Anti-inflammatory Drugs      | 6,467    | 72.4     |
| Antihyperlipidemic agents                 | 6,144    | 68.8     |
| Proton Pump Inhibitor                     | 2,540    | 28.4     |
| Angiotensin Converting Enzyme Inhibitor   | 2,321    | 25.9     |
| Injectable Antidiabetic Agent             | 2,253    | 25.2     |
| Calcium Channel Blocker                   | 2,162    | 24.2     |
| Corticosteroid , Local                    | 1,892    | 21.1     |
| Diuretic                                  | 1,934    | 21.6     |
| Beta-Adrenergic Blocker, Beta-1 Selective | 1,806    | 20.2     |
| Angiotensin II Receptor Blocker           | 1,796    | 20.1     |
| Thyroid Analog                            | 1,355    | 15.1     |
| Histamine H2 Blocker                      | 822      | 9.2      |
| Anticoagulants                            | 706      | 7.9      |
| Corticosteroid , Systemic                 | 600      | 6.7      |
| Antiplatelet                              | 357      | 4.0      |

**Table 3**  
**Adjusted Odds Ratios (AOR) and 95% Confidence Intervals (CI)**  
**Logistic Regression on Polypharmacy**  
**Adults with Diabetes,**  
**Electronic Health Records database, 2016**

|                                   | AOR  | 95% CI          | Sig. |
|-----------------------------------|------|-----------------|------|
| <b>Age Group</b>                  |      |                 |      |
| 30-39 vs. 18-29                   | 1.48 | [ 1.00 , 2.18]  | **   |
| 40-49 vs. 18-29                   | 2.13 | [ 1.47 , 3.08]  | ***  |
| 50-59 vs. 18-29                   | 3.54 | [ 2.46 , 5.11]  | ***  |
| 60-69 vs. 18-29                   | 5.11 | [ 3.51 , 7.44]  | ***  |
| 70-79 vs. 18-29                   | 7.59 | [ 5.07 , 11.35] | ***  |
| ≥80 vs. 18-29                     | 9.65 | [ 5.69 , 16.38] | ***  |
| <b>Marital Status</b>             |      |                 |      |
| Single vs. Married                | 1.16 | [ 0.96 , 1.40]  |      |
| <b>Gender</b>                     |      |                 |      |
| Female vs. Male                   | 1.60 | [ 1.43 , 1.79]  | ***  |
| <b>Nationality</b>                |      |                 |      |
| Non-Saudi vs. Saudi               | 1.81 | [ 1.50 , 2.19]  | ***  |
| <b>Cardiovascular Conditions</b>  |      |                 |      |
| Yes vs. No                        | 2.89 | [ 2.54 , 3.29]  | ***  |
| <b>Musculoskeletal Conditions</b> |      |                 |      |
| Yes vs. No                        | 3.16 | [ 2.31 , 4.30]  | ***  |
| <b>Respiratory Conditions</b>     |      |                 |      |
| Yes vs. No                        | 2.42 | [ 1.92 , 3.03]  | ***  |
| <b>Mental Health Conditions</b>   |      |                 |      |
| Yes Vs. No                        | 2.19 | [ 1.74 , 2.76]  | ***  |

Note: Based on 8,932 adults with diabetes, who visited outpatient's clinics from a tertiary hospital in 2016. Polypharmacy was defined as the cumulative use of five or more medications during the one year period. Asterisks (\*) represent significant differences on polypharmacy compared to the reference group based on logistic regression.

\*\*\*P< 0.001, \*\* 0.001≤ P< 0.01

Ref: Reference Group

1  
2  
3  
4  
5  
6  
7  
8  
9  
10  
11  
12  
13  
14  
15  
16  
17  
18  
19  
20  
21  
22  
23  
24  
25  
26  
27  
28  
29  
30  
31  
32  
33  
34  
35  
36  
37  
38  
39  
40  
41  
42  
43  
44  
45  
46  
47  
48  
49  
50  
51  
52  
53  
54  
55  
56  
57  
58  
59  
60

For peer review only

**Appendix I**  
**Diagnoses codes used to identify the types of chronic conditions**  
**Electronic Health Records database, 2016**

| Type of Chronic Conditions        | ICD-9-CM Codes | ICD-10-CM Codes   | SNOMED Codes                                                                                                                                              |
|-----------------------------------|----------------|-------------------|-----------------------------------------------------------------------------------------------------------------------------------------------------------|
| <b>Diabetes</b>                   | 250, 250.00    | E11, E11.9, E14.9 | 121589010, 502372015                                                                                                                                      |
| <b>Cardiovascular Conditions</b>  |                |                   |                                                                                                                                                           |
| Hypertension                      | 401.9          | I10, 10           | 64176011, 2164904016                                                                                                                                      |
| Ischemic heart disease            |                | I25, I25.9        | 2534671011, 2537479013, 397667016, 2534663012                                                                                                             |
| Vascular heart disease            |                |                   | 1705016                                                                                                                                                   |
| Stroke                            |                | I64               | 2644233012, 2476091017, 345636015, 345682011                                                                                                              |
| Heart failure                     | 428.0, 428.1   | I50, I50.9        | 1234906013, 143156018, 251680018, 94251011, 2645367010, 18472010, 139475013, 2816764017, 493289014, 70653017, 80720010                                    |
| Dyslipidemia                      |                | E78.5             | 92826017, 1209706018                                                                                                                                      |
| <b>Musculoskeletal Conditions</b> |                |                   |                                                                                                                                                           |
| osteoarthritis                    |                |                   | 1776248011, 359420013, 359421012, 1785522017                                                                                                              |
| Osteoporosis                      |                | M81.99            | 453855011, 107806013                                                                                                                                      |
| <b>Respiratory Conditions</b>     |                |                   |                                                                                                                                                           |
| Asthma                            | 493, 493.90    | J45               | 301485011, 301480018                                                                                                                                      |
| COPD                              |                | J44.1, J44.9      | 23290013, 23287019, 475431013, 475427019                                                                                                                  |
| <b>Mental Health Conditions</b>   |                |                   |                                                                                                                                                           |
| Dementia                          |                | F02               | 87274019                                                                                                                                                  |
| Depression                        | 311            | F31.3             | 486186018, 486187010, 110183011, 346973011, 346979010, 55208011, 454082014, 486187010, 124707013, 1208903011, 490537016, 346980013, 1228731019, 486184015 |
| Anxiety                           |                | F41.8, F41.9      | 346980013, 369987018, 303689015, 481155011, 81133019                                                                                                      |
| Schizophrenia                     |                | F20               | 114425016, 405368015, 294764011, 138883015, 96745016                                                                                                      |

ICD-9-CM codes: International Classifications of Diseases – 9th edition, Clinical Modification

ICD-10-CM codes: International Classifications of Diseases – 10th edition

SNOMED: Clinical Modification Systematized Nomenclature of Medicine

COPD: Chronic Obstructive Pulmonary Disease

STROBE Statement—checklist of items that should be included in reports of observational studies

|                           | <b>Item No.</b> | <b>Recommendation</b>                                                                               | <b>Page No.</b> | <b>Relevant text from manuscript</b>                                                                                                                                                                                                                                                                                                                                                                                                                                                                                                                                                                                                                                                                                                                                                                                                                                                                                                                                                                                                                                                                                                                                                                                                                                                                                                                                                                    |
|---------------------------|-----------------|-----------------------------------------------------------------------------------------------------|-----------------|---------------------------------------------------------------------------------------------------------------------------------------------------------------------------------------------------------------------------------------------------------------------------------------------------------------------------------------------------------------------------------------------------------------------------------------------------------------------------------------------------------------------------------------------------------------------------------------------------------------------------------------------------------------------------------------------------------------------------------------------------------------------------------------------------------------------------------------------------------------------------------------------------------------------------------------------------------------------------------------------------------------------------------------------------------------------------------------------------------------------------------------------------------------------------------------------------------------------------------------------------------------------------------------------------------------------------------------------------------------------------------------------------------|
| <b>Title and abstract</b> | 1               | (a) Indicate the study’s design with a commonly used term in the title or the abstract              | 1               | Polypharmacy Use among Patients with Diabetes: A Cross-Sectional Retrospective Study in a Tertiary Hospital in Saudi Arabia                                                                                                                                                                                                                                                                                                                                                                                                                                                                                                                                                                                                                                                                                                                                                                                                                                                                                                                                                                                                                                                                                                                                                                                                                                                                             |
|                           |                 | (b) Provide in the abstract an informative and balanced summary of what was done and what was found | 2               | A cross-sectional retrospective observational study of adults with diabetes, who visited the outpatient clinic of a tertiary teaching hospital in Saudi Arabia, was conducted. Data were extracted from the Electronic Health Record (EHR) database for a period of twelve-month (January to December 2016). Polypharmacy was defined as the cumulative use of five or more medication classes. Polypharmacy among adults with diabetes was measured by calculating the average number of medication classes prescribed per patient. A multivariable logistic regression model was used to examine the factors associated with polypharmacy after adjusting for age, sex, marital status, nationality, and co-existing chronic conditions. A total of 8,932 adults with diabetes were included in this study. Of these, nearly 78 % had polypharmacy, which was more likely among women as compared to men and more likely among the elderly (age ≥ 60 years) as compared to the adults. Also, polypharmacy was two times as likely among patients with coexisting cardiovascular disease (AOR=2.89; 95% CI: 2.54-3.29), respiratory disease (AOR=2.42; 95% CI: 1.92-3.03), and mental health conditions (AOR=2.19; 95% CI: 1.74-2.76), and three times as likely among patients with co-existing musculoskeletal disease as compared to those without these co-existing chronic conditions categories. |
| <b>Introduction</b>       |                 |                                                                                                     |                 |                                                                                                                                                                                                                                                                                                                                                                                                                                                                                                                                                                                                                                                                                                                                                                                                                                                                                                                                                                                                                                                                                                                                                                                                                                                                                                                                                                                                         |
| Background/rationale      | 2               | Explain the scientific background and rationale for the investigation being reported                | 4               | Diabetes is a highly prevalent chronic condition among adults in Saudi Arabia; between 21-24% of adults are estimated to have diabetes. It is projected that 27% of adults in Saudi Arabia will have diabetes by 2035.                                                                                                                                                                                                                                                                                                                                                                                                                                                                                                                                                                                                                                                                                                                                                                                                                                                                                                                                                                                                                                                                                                                                                                                  |

|                |   |                                                                                                                                                                                                                                                                                                                                  |     |                                                                                                                                                                                                                                                                                                                                                                                                                                                                                                                       |
|----------------|---|----------------------------------------------------------------------------------------------------------------------------------------------------------------------------------------------------------------------------------------------------------------------------------------------------------------------------------|-----|-----------------------------------------------------------------------------------------------------------------------------------------------------------------------------------------------------------------------------------------------------------------------------------------------------------------------------------------------------------------------------------------------------------------------------------------------------------------------------------------------------------------------|
|                |   |                                                                                                                                                                                                                                                                                                                                  |     | Diabetes is one of the top ten causes of morbidity and mortality worldwide. Patients with diabetes often have co-existing chronic health conditions such as hypertension, dyslipidemia, coronary artery disease, depression and renal disease, which require the use of multiple medications to treat those co-existing chronic conditions. All of this put patients with diabetes at high risk of polypharmacy, with an estimated prevalence of 57% to 84% of patients with diabetes using five or more medications. |
|                |   |                                                                                                                                                                                                                                                                                                                                  |     | Limited studies have examined the prevalence of polypharmacy among adults with diabetes living in Saudi Arabia on a large scale, and looking at specific factors that put patients at risk of polypharmacy. Identifying the prevalence and the subgroup of patients at high risk of polypharmacy will facilitate pharmacovigilance efforts in clinical practice settings.                                                                                                                                             |
| Objectives     | 3 | State specific objectives, including any prespecified hypotheses                                                                                                                                                                                                                                                                 | 5   | The primary objective of this study is to examine the prevalence of polypharmacy among adults with diabetes in Saudi Arabia and to identify the factors that are associated with polypharmacy, specifically the association between co-existing chronic conditions and polypharmacy.                                                                                                                                                                                                                                  |
| <b>Methods</b> |   |                                                                                                                                                                                                                                                                                                                                  |     |                                                                                                                                                                                                                                                                                                                                                                                                                                                                                                                       |
| Study design   | 4 | Present key elements of study design early in the paper                                                                                                                                                                                                                                                                          | 5   | A cross-sectional retrospective observational study was conducted in a tertiary teaching hospital in Saudi Arabia                                                                                                                                                                                                                                                                                                                                                                                                     |
| Setting        | 5 | Describe the setting, locations, and relevant dates, including periods of recruitment, exposure, follow-up, and data collection                                                                                                                                                                                                  | 5,6 | Outpatient's setting in the tertiary teaching hospital during a one-year period. From 1 <sup>st</sup> January 2016, until 30 <sup>th</sup> December 2016. The study population comprised of all adult patients with diabetes (Type I and Type II) (age $\geq$ 18-year) (n = 8,932). This study used data retrieved from the Electronic Health Record (EHR). The data from EHR were derived from demographics file, clinical diagnosis file, and prescription drug file.                                               |
| Participants   | 6 | (a) <i>Cohort study</i> —Give the eligibility criteria, and the sources and methods of selection of participants. Describe methods of follow-up<br><i>Case-control study</i> —Give the eligibility criteria, and the sources and methods of case ascertainment and control selection. Give the rationale for the choice of cases | 6   | The study population comprised of all adult patients with diabetes (Type I and Type II) (age $\geq$ 18-year) (n = 8,932) who received their treatment at the outpatient's setting in the tertiary teaching hospital during a one-year period.                                                                                                                                                                                                                                                                         |

1  
2  
3  
4  
5  
6  
7  
8  
9  
10  
11  
12  
13  
14  
15  
16  
17  
18  
19  
20  
21  
22  
23  
24  
25  
26  
27  
28  
29  
30  
31  
32  
33  
34  
35  
36  
37  
38  
39  
40  
41  
42  
43  
44  
45  
46  
47

|                              |    |                                                                                                                                                                                      |     |                                                                                                                                                                                                                                                                                                                                                                                                                                                                                                                                                                                                                                                                                                                                                                                                                                                                                                                                                                                                                                                                                                                                                                                                                                                                               |
|------------------------------|----|--------------------------------------------------------------------------------------------------------------------------------------------------------------------------------------|-----|-------------------------------------------------------------------------------------------------------------------------------------------------------------------------------------------------------------------------------------------------------------------------------------------------------------------------------------------------------------------------------------------------------------------------------------------------------------------------------------------------------------------------------------------------------------------------------------------------------------------------------------------------------------------------------------------------------------------------------------------------------------------------------------------------------------------------------------------------------------------------------------------------------------------------------------------------------------------------------------------------------------------------------------------------------------------------------------------------------------------------------------------------------------------------------------------------------------------------------------------------------------------------------|
|                              |    | and controls                                                                                                                                                                         |     | No exclusion criteria were applied to the study population.                                                                                                                                                                                                                                                                                                                                                                                                                                                                                                                                                                                                                                                                                                                                                                                                                                                                                                                                                                                                                                                                                                                                                                                                                   |
|                              |    | <i>Cross-sectional study</i> —Give the eligibility criteria, and the sources and methods of selection of participants                                                                |     |                                                                                                                                                                                                                                                                                                                                                                                                                                                                                                                                                                                                                                                                                                                                                                                                                                                                                                                                                                                                                                                                                                                                                                                                                                                                               |
|                              |    | <i>(b) Cohort study</i> —For matched studies, give matching criteria and number of exposed and unexposed                                                                             |     |                                                                                                                                                                                                                                                                                                                                                                                                                                                                                                                                                                                                                                                                                                                                                                                                                                                                                                                                                                                                                                                                                                                                                                                                                                                                               |
|                              |    | <i>Case-control study</i> —For matched studies, give matching criteria and the number of controls per case                                                                           |     |                                                                                                                                                                                                                                                                                                                                                                                                                                                                                                                                                                                                                                                                                                                                                                                                                                                                                                                                                                                                                                                                                                                                                                                                                                                                               |
| Variables                    | 7  | Clearly define all outcomes, exposures, predictors, potential confounders, and effect modifiers. Give diagnostic criteria, if applicable                                             | 6,7 | The dependent variable was “polypharmacy use”. There are different approaches in the literature to measure polypharmacy such as simultaneous, cumulative and continuous. Also, there is no consensus on the thresholds regarding the number of medications above which we consider the existence of polypharmacy. In the current study, we defined polypharmacy as the cumulative use of five or more medications during a one year period, this threshold has been used more than others. Using this definition, the prevalence of polypharmacy among adults was measured by the sum of unique therapeutic medication classes administered over a twelve-month period. There is no consensus on the medications that should be included in the measurements of the polypharmacy. Also, all the prescription and the non-prescription/Over the Counter (OTC) medications categories were included in our definition of polypharmacy.<br><br>Independent variables included were age groups in years (18-29, 30-39, 40-49, 50-59, ≥60), gender, nationality (Saudi, non-Saudi), marital status (married, unmarried), and documented chronic conditions which were classified into four categories (cardiovascular, musculoskeletal, respiratory, or mental health conditions). |
| Data sources/<br>measurement | 8* | For each variable of interest, give sources of data and details of methods of assessment (measurement). Describe comparability of assessment methods if there is more than one group | 6,7 | The prevalence of polypharmacy among adults was measured by the sum of different medication classes administered over a twelve-month period.<br><br>Chronic conditions were identified using the the clinical diagnosis file which                                                                                                                                                                                                                                                                                                                                                                                                                                                                                                                                                                                                                                                                                                                                                                                                                                                                                                                                                                                                                                            |



1  
2  
3  
4  
5  
6  
7  
8  
9  
10  
11  
12  
13  
14  
15  
16  
17  
18  
19  
20  
21  
22  
23  
24  
25  
26  
27  
28  
29  
30  
31  
32  
33  
34  
35  
36  
37  
38  
39  
40  
41  
42  
43  
44  
45  
46  
47

|            |    |                                                           |    |                                                                                                                                                                                                                                                                                                                                                                                                                                                                |
|------------|----|-----------------------------------------------------------|----|----------------------------------------------------------------------------------------------------------------------------------------------------------------------------------------------------------------------------------------------------------------------------------------------------------------------------------------------------------------------------------------------------------------------------------------------------------------|
|            |    |                                                           |    | provided information about the clinical diagnosis from inpatient and outpatient visits. Physicians reported clinical diagnosis using the <i>International Classifications of Diseases – 9<sup>th</sup> edition, Clinical Modification</i> (ICD-9-CM) codes, <i>International Classifications of Diseases – 10<sup>th</sup> edition, Clinical Modification</i> (ICD-10-CM) codes, or the <i>Systematized Nomenclature of Medicine</i> (SNOMED) diagnosis codes. |
| Bias       | 9  | Describe any efforts to address potential sources of bias | 11 | By using the EHR data; we cannot eliminate some risk of bias; inaccurate information, or missing data related to the use of EHR.                                                                                                                                                                                                                                                                                                                               |
| Study size | 10 | Explain how the study size was arrived at                 | 6  | The study population comprised of all adult patients with diabetes (Type I and Type II) (age $\geq 18$ -year) (n = 8,932) who received their treatment at the outpatient's setting in the tertiary teaching hospital during a one-year period. We have included all diabetic adults who visited a tertiary teaching hospital during one year period.                                                                                                           |

Continued on next page

|                        |     |                                                                                                                                                                                                                                                                                                           |    |                                                                                                                                                                                                                                                                                                                                                                                                                                                                                                                                                                       |
|------------------------|-----|-----------------------------------------------------------------------------------------------------------------------------------------------------------------------------------------------------------------------------------------------------------------------------------------------------------|----|-----------------------------------------------------------------------------------------------------------------------------------------------------------------------------------------------------------------------------------------------------------------------------------------------------------------------------------------------------------------------------------------------------------------------------------------------------------------------------------------------------------------------------------------------------------------------|
| Quantitative variables | 11  | Explain how quantitative variables were handled in the analyses. If applicable, describe which groupings were chosen and why                                                                                                                                                                              | 7  | Age groups in years (18-29, 30-39, 40-49, 50-59, ≥60), gender, nationality (Saudi, non-Saudi), marital status (married, unmarried), and documented chronic conditions which were classified into four categories (cardiovascular, musculoskeletal, respiratory, or mental health conditions).                                                                                                                                                                                                                                                                         |
| Statistical methods    | 12  | (a) Describe all statistical methods, including those used to control for confounding                                                                                                                                                                                                                     | 7  | Frequency and percentage were used to describe the categorical variables (age, sex, marital status, nationality, co-existing chronic conditions, and polypharmacy). Mean and Standard deviation were used to describe continuous variables. Chi-square tests were used to examine the factors associated with polypharmacy use. A multivariable logistic regression was used to examine the factors associated with polypharmacy (i.e., use of ≥ 5 medication classes) after adjusting for age, sex, marital status, nationality, and co-existing chronic conditions. |
|                        |     | (b) Describe any methods used to examine subgroups and interactions                                                                                                                                                                                                                                       | 11 | Not Applicable                                                                                                                                                                                                                                                                                                                                                                                                                                                                                                                                                        |
|                        |     | (c) Explain how missing data were addressed                                                                                                                                                                                                                                                               | 11 | For all the variables, the sum add up to the total study population and we did not have missing data.                                                                                                                                                                                                                                                                                                                                                                                                                                                                 |
|                        |     | (d) <i>Cohort study</i> —If applicable, explain how loss to follow-up was addressed<br><i>Case-control study</i> —If applicable, explain how matching of cases and controls was addressed<br><i>Cross-sectional study</i> —If applicable, describe analytical methods taking account of sampling strategy |    | Our study design was cross-sectional data in nature, we have include all adults who visited a tertiary teaching hospital with diabetes diagnosis without sampling strategy.                                                                                                                                                                                                                                                                                                                                                                                           |
|                        |     | (e) Describe any sensitivity analyses                                                                                                                                                                                                                                                                     |    | Not Applicable                                                                                                                                                                                                                                                                                                                                                                                                                                                                                                                                                        |
| <b>Results</b>         |     |                                                                                                                                                                                                                                                                                                           |    |                                                                                                                                                                                                                                                                                                                                                                                                                                                                                                                                                                       |
| Participants           | 13* | (a) Report numbers of individuals at each stage of study—eg numbers potentially eligible, examined for eligibility, confirmed eligible, included in the study, completing follow-up, and analysed                                                                                                         | 6  | n = 8,932                                                                                                                                                                                                                                                                                                                                                                                                                                                                                                                                                             |
|                        |     | (b) Give reasons for non-participation at each stage                                                                                                                                                                                                                                                      |    | Not Applicable                                                                                                                                                                                                                                                                                                                                                                                                                                                                                                                                                        |
|                        |     | (c) Consider use of a flow diagram                                                                                                                                                                                                                                                                        |    |                                                                                                                                                                                                                                                                                                                                                                                                                                                                                                                                                                       |
| Descriptive data       | 14* | (a) Give characteristics of study participants (eg demographic, clinical, social) and information on exposures and potential confounders                                                                                                                                                                  | 8  | The majority were female (62.2%), and 43.3% of the study population were elderly (age ≥60 years). About half of the subjects (54.1%) had two or more diagnosed co-existing chronic health conditions.                                                                                                                                                                                                                                                                                                                                                                 |

|                        |     |                                                                                                                                                                                                              |    |                                                                                    |
|------------------------|-----|--------------------------------------------------------------------------------------------------------------------------------------------------------------------------------------------------------------|----|------------------------------------------------------------------------------------|
|                        |     | (b) Indicate number of participants with missing data for each variable of interest                                                                                                                          | 11 | We did not have missing data in our analysis.                                      |
|                        |     | (c) <i>Cohort study</i> —Summarise follow-up time (eg, average and total amount)                                                                                                                             |    |                                                                                    |
| Outcome data           | 15* | <i>Cohort study</i> —Report numbers of outcome events or summary measures over time                                                                                                                          |    |                                                                                    |
|                        |     | <i>Case-control study</i> —Report numbers in each exposure category, or summary measures of exposure                                                                                                         |    |                                                                                    |
|                        |     | <i>Cross-sectional study</i> —Report numbers of outcome events or summary measures                                                                                                                           | 8  | 77.9 % of adults with diabetes were using five or more medication classes.         |
| Main results           | 16  | (a) Give unadjusted estimates and, if applicable, confounder-adjusted estimates and their precision (eg, 95% confidence interval). Make clear which confounders were adjusted for and why they were included | 9  | Confounder-adjusted estimates were age, gender and co-existing chronic conditions. |
|                        |     | (b) Report category boundaries when continuous variables were categorized                                                                                                                                    |    | For the age group, we used 10 years category boundry                               |
|                        |     | (c) If relevant, consider translating estimates of relative risk into absolute risk for a meaningful time period                                                                                             |    | Not Applicable                                                                     |
| Continued on next page |     |                                                                                                                                                                                                              |    |                                                                                    |

1  
2  
3  
4  
5  
6  
7  
8  
9  
10  
11  
12  
13  
14  
15  
16  
17  
18  
19  
20  
21  
22  
23  
24  
25  
26  
27  
28  
29  
30  
31  
32  
33  
34  
35  
36  
37  
38  
39  
40  
41  
42  
43  
44  
45  
46  
47

|                   |    |                                                                                                                                                                            |    |                                                                                                                                                                                                                                                                                                                                                                                                                                                                                                                                                                                                                                                                                                                                                                                                                                                                                                                                                                                                                                                                                                          |
|-------------------|----|----------------------------------------------------------------------------------------------------------------------------------------------------------------------------|----|----------------------------------------------------------------------------------------------------------------------------------------------------------------------------------------------------------------------------------------------------------------------------------------------------------------------------------------------------------------------------------------------------------------------------------------------------------------------------------------------------------------------------------------------------------------------------------------------------------------------------------------------------------------------------------------------------------------------------------------------------------------------------------------------------------------------------------------------------------------------------------------------------------------------------------------------------------------------------------------------------------------------------------------------------------------------------------------------------------|
| Other analyses    | 17 | Report other analyses done—eg analyses of subgroups and interactions, and sensitivity analyses                                                                             | 11 | Not Applicable                                                                                                                                                                                                                                                                                                                                                                                                                                                                                                                                                                                                                                                                                                                                                                                                                                                                                                                                                                                                                                                                                           |
| <b>Discussion</b> |    |                                                                                                                                                                            |    |                                                                                                                                                                                                                                                                                                                                                                                                                                                                                                                                                                                                                                                                                                                                                                                                                                                                                                                                                                                                                                                                                                          |
| Key results       | 18 | Summarise key results with reference to study objectives                                                                                                                   | 9  | Our study estimated the prevalence of polypharmacy among adults with diabetes in Saudi Arabia. In our study population, the rate of polypharmacy was high; nearly eighty percent of adults with diabetes used five or more medication classes. While this rate is within the documented rate in the literature among adults with diabetes 57% to 84%, we could not find a study that reported the rate of polypharmacy among all age groups of adults with diabetes. We observed a higher rate of polypharmacy among the elderly as compared to all age groups.                                                                                                                                                                                                                                                                                                                                                                                                                                                                                                                                          |
| Limitations       | 19 | Discuss limitations of the study, taking into account sources of potential bias or imprecision. Discuss both direction and magnitude of any potential bias                 | 11 | This study has some limitations; we used a 12-month period to measure multiple medications use, which is not concurrent use and may have resulted in a very high rate of multiple medications uses. We did not control for the severity of diabetes using the Diabetes Complications Severity Index (DCSI) which may affect the rate of polypharmacy. We have also only observed filled prescriptions and not actual use of the medications. By using the EHR data; so we cannot eliminate some risk of bias; inaccurate information, or missing data related to the use of EHR. Due to the cross-sectional nature of the data; it is difficult to assess the causal relationship. People with the end of life care were included and this may have overestimated the rate of polypharmacy. Moreover, we have included all medication classes, including the topical agents, and vitamins in our definition, which may have overestimated the rate of polypharmacy. It has to be noticed that not all polypharmacy is harmful; however, we have not assessed if the polypharmacy was appropriate or not. |
| Interpretation    | 20 | Give a cautious overall interpretation of results considering objectives, limitations, multiplicity of analyses, results from similar studies, and other relevant evidence | 9  | The very high rate of polypharmacy observed in our study population suggests that health care providers need to routinely monitor these individuals for potentially inappropriate medications, adverse drug events, and drug-drug interactions. Diabetes patients with polypharmacy may benefit from                                                                                                                                                                                                                                                                                                                                                                                                                                                                                                                                                                                                                                                                                                                                                                                                     |

1  
2  
3  
4  
5  
6  
7  
8  
9  
10  
11  
12  
13  
14  
15  
16  
17  
18  
19  
20  
21  
22  
23  
24  
25  
26  
27  
28  
29  
30  
31  
32  
33  
34  
35  
36  
37  
38  
39  
40  
41  
42  
43  
44  
45  
46  
47

---

multidisciplinary collaborative care model that involves pharmacist follow up for the patients to assess the medication use.

---

Generalisability 21 Discuss the generalisability (external validity) of the study results

This study was conducted in a tertiary hospital in Riyadh; therefore the findings from this study cannot be generalized to primary care settings or to other regions in Saudi Arabia.

---

**Other information**

Funding 22 Give the source of funding and the role of the funders for the present study and, if applicable, for the original study on which the present article is based

Not Applicable

---

\*Give information separately for cases and controls in case-control studies and, if applicable, for exposed and unexposed groups in cohort and cross-sectional studies.

**Note:** An Explanation and Elaboration article discusses each checklist item and gives methodological background and published examples of transparent reporting. The STROBE checklist is best used in conjunction with this article (freely available on the Web sites of PLoS Medicine at <http://www.plosmedicine.org/>, Annals of Internal Medicine at <http://www.annals.org/>, and Epidemiology at <http://www.epidem.com/>). Information on the STROBE Initiative is available at [www.strobe-statement.org](http://www.strobe-statement.org).
