# Supplementary material for: Polypharmacy among patients with diabetes: a cross-sectional retrospective study in a tertiary hospital in Saudi Arabia
Source: PubMed Central journal article supplement — BMJ Open. 2018 May 24;8(5):e020852. doi: 10.1136/bmjopen-2017-020852 (PMC5988096; doi:10.1136/bmjopen-2017-020852), 2018-05-24
Supplement: bmjopen-2017-020852supp001.pdf [file bmjopen-2017-020852supp001.pdf]

**Appendix I**  
**Diagnoses codes used to identify the types of chronic conditions**  
**Electronic Health Records database, 2016**

| Type of Chronic Conditions        | ICD-9-CM<br>Codes | ICD-10-CM<br>Codes   | SNOMED Codes                                                                                                                                                             |
|-----------------------------------|-------------------|----------------------|--------------------------------------------------------------------------------------------------------------------------------------------------------------------------|
| <b>Diabetes</b>                   | 250, 250.00       | E11, E11.9,<br>E14.9 | 121589010, 502372015                                                                                                                                                     |
| <b>Cardiovascular Conditions</b>  |                   |                      |                                                                                                                                                                          |
| Hypertension                      | 401.9             | I10, 10              | 64176011, 2164904016                                                                                                                                                     |
| Ischemic heart disease            |                   | I25, I25.9           | 2534671011, 2537479013,<br>397667016, 2534663012                                                                                                                         |
| Vascular heart disease            |                   |                      | 1705016                                                                                                                                                                  |
| Stroke                            |                   | I64                  | 2644233012 , 2476091017,<br>345636015, 345682011                                                                                                                         |
| Heart failure                     | 428.0, 428.1      | I50,I50.9            | 1234906013, 143156018,<br>251680018, 94251011, 2645367010,<br>18472010, 139475013, 2816764017,<br>493289014, 70653017, 80720010                                          |
| Dyslipidemia                      |                   | E78.5                | 92826017, 1209706018                                                                                                                                                     |
| <b>Musculoskeletal Conditions</b> |                   |                      |                                                                                                                                                                          |
| osteoarthritis                    |                   |                      | 1776248011, 359420013,<br>359421012, 1785522017                                                                                                                          |
| Osteoporosis                      |                   | M81.99               | 453855011, 107806013                                                                                                                                                     |
| <b>Respiratory Conditions</b>     |                   |                      |                                                                                                                                                                          |
| Asthma                            | 493, 493.90       | J45                  | 301485011, 301480018                                                                                                                                                     |
| COPD                              |                   | J44.1, J44.9         | 23290013, 23287019, 475431013,<br>475427019                                                                                                                              |
| <b>Mental Health Conditions</b>   |                   |                      |                                                                                                                                                                          |
| Dementia                          |                   | F02                  | 87274019                                                                                                                                                                 |
| Depression                        | 311               | F31.3                | 486186018, 486187010, 110183011,<br>346973011, 346979010, 55208011,<br>454082014, 486187010, 124707013,<br>1208903011, 490537016,<br>346980013, 1228731019,<br>486184015 |
| Anxiety                           |                   | F41.8, F41.9         | 346980013, 369987018, 303689015,<br>481155011, 81133019                                                                                                                  |
| Schizophrenia                     |                   | F20                  | 114425016, 405368015, 294764011,<br>138883015, 96745016                                                                                                                  |

ICD-9-CM codes: International Classifications of Diseases – 9th edition, Clinical Modification

ICD-10-CM codes: International Classifications of Diseases – 10th edition

SNOMED: Clinical Modification Systematized Nomenclature of Medicine

COPD: Chronic Obstructive Pulmonary Disease
